# Supplementary material for: Chemodosimetric analysis in food-safety monitoring: design, synthesis, and application of a bimetallic Re(i)–Pt(ii) complex for detection of dimethyl sulfide in foods
Source: Royal Society of Chemistry journal article supplement (doi:10.1039/c4an00120f), 2014-01-01
Supplement: c4an00120f1.pdf [file c4an00120f1.pdf]

# **Chemodosimetric Analysis in Food-Safety Monitoring: Design, Synthesis, and Application of Bimetallic Re(I)-Pt(II) Complexes for Detection of Biogenic Sulfide Odorants in Foods**

## **Supporting information**

Cheuk-Fai Chow<sup>\*a,b</sup>, Fu-Wen Gong<sup>c</sup>, Cheng-Bin Gong<sup>\*c</sup>

<sup>a</sup>Department of Science and Environmental Studies, The Hong Kong Institute of Education, 10 Lo Ping Road, Tai Po Hong Kong SAR, China. <sup>b</sup>Centre for Education in Environmental Sustainability, The Hong Kong Institute of Education, 10 Lo Ping Road, Tai Po Hong Kong SAR, China. <sup>c</sup>College of Chemistry and Chemical Engineering, Southwest University, Chong Qing, China.

E-mail: cfchow@ied.edu.hk; Fax: (+852) 29487676; Tel: (+852) 29487671

EXPERIMENTAL SECTION

**(i) Materials and General Procedures.** The ligands (*Lig*), 2,2'-biquinoline (*biq*), 5-phenyl-1,10-phenanthroline (*5-ph-phen*), and 2,2'-bipyridine (*bpy*),  $K_2(PtCl_4)$ ,  $Re(CO)_5Cl$ , KCN, dimethyl sulfide (99%), propanoic acid (99%), 4-ethylphenol (99%), and triethylamine (99%), were obtained from Aldrich. Dimethyl disulfide (99%) was obtained from Acros, and dimethyl trisulfide (98%) was purchased from TCI. Gaseous  $H_2S$  (99.5%),  $CO$  (99.95%), and  $CH_4$  (99.9%) were obtained from Hong Kong Special Gas Company. *fac*- $[Re(Lig)(CO)_3Cl]$ ,<sup>1</sup>  $Re(Lig)(CO)_3CN$ ,<sup>2</sup> and  $Pt(DMSO)_2Cl_2$ <sup>3</sup> were prepared according to reported methods. All solvents used were of analytical grade.

**(ii) Physical Measurements and Instrumentation.**  $^1H$  NMR spectra were recorded using a Bruker AVANCE III System 400MHz NMR spectrometer. Electrospray mass spectroscopy (ESI-MS) was performed using an AB SCIEX API 2000 LC/MS/MS system. Elemental analyses were performed using a Vario EL CHN analyzer. Infrared spectra in the range 500–4000  $cm^{-1}$  using KBr pellets were recorded on a Perkin Elmer Model Frontier FTIR spectrometer, and UV-vis spectra were measured on a Cary 50 ultraviolet-visible spectrophotometer. Emission spectra were recorded using a Horiba FluoroMax-4 spectrofluorimetric with a 5 nm slit width and 0.5 s integration time. Luminescence quantum yields were measured using the optical dilution method<sup>4</sup> with an aerated aqueous solution of  $[Ru(bpy)_3]Cl_2$  ( $\phi = 0.028$ , excitation wavelength of 455 nm)<sup>5</sup> as the standard solution.

**Crystal Structure Determination:** Yellow-orange single-plated crystals of  $[Re(biq)(CO)_3(CN)]-[Pt(DMSO)(Cl)_2]$  (**1**) were grown by slow diffusion of diethyl ether into a  $CH_2Cl_2$  solution of the complex. Geometric and intensity data for the complexes were collected on a Bruker Smart Apex II CCD diffractometer with Cu  $K\alpha$  radiation ( $\lambda = 1.54180 \text{ \AA}$ ) at 293(2) K. The intensities were corrected for Lorentz and polarization factors, as well as for absorption using the multiscan method.<sup>6</sup> All the structures of the complexes were solved by direct methods (SHELX-97)<sup>7</sup> in

conjunction with standard difference Fourier techniques and subsequently refined by the full-matrix least-squares method on  $F^2$ . Nonhydrogen atoms were refined with anisotropic displacement parameters. The hydrogen atoms were generated in their idealized positions and allowed to ride on the respective carbon atoms.

**Re(*biq*)(CO)<sub>3</sub>(CN).** The complex was synthesized by modification of the method reported by Leasure<sup>2a</sup> and Takeda,<sup>2b</sup> as follows: An ethanol/water (2:1 v/v, 100 mL) mixture containing *fac*-[Re(*biq*)(CO)<sub>3</sub>Cl] (0.150 g, 0.267 mmol) and KCN (1.00 g, 15.6 mmol) was refluxed under a N<sub>2</sub> atmosphere for 2 h. During the reaction, the red suspension clarified and became reddish black. The reaction was monitored by TLC analysis until no starting materials remained (silica gel and ethyl acetate, R<sub>f</sub> = 0.55). The ethanol extract was evaporated and the orange crude solid suspended in water was collected by suction filtration. The complex was isolated by column chromatography on silica gel with ethyl acetate/MeOH (v/v 3:1). Two bands appeared in the column: The first band contained the organic ligand (R<sub>f</sub> = 0.95 with purple luminescence) and the second band contained the pure product (R<sub>f</sub> = 0.4 with red-orange luminescence). The complex was obtained as an orange solid (yield = 50%) and was characterized by <sup>1</sup>H-NMR, ESI-MS, IR spectroscopy, and microanalysis. (400 MHz, DMSO)  $\delta$  ppm = 8.93 (d,  $J$  = 8.8 Hz, 2H), 8.89 (d,  $J$  = 9.2 Hz, 2H), 8.63 (d,  $J$  = 9.2 Hz, 2H), 8.15 (d,  $J$  = 8.0 Hz, 2H), 8.04 (t,  $J$  = 5.6 Hz, 2H), 7.79 (t,  $J$  = 7.6 Hz, 2H). IR (KBr):  $\nu_{\text{C}\equiv\text{N}}$  = 2122 cm<sup>-1</sup>;  $\nu_{\text{C}\equiv\text{O}}$  = 2010 and 1893 cm<sup>-1</sup>. ESI-MS (+ve mode):  $m/z$  575.7 {[Re(*biq*)(CO)<sub>3</sub>(CN)]•Na}<sup>+</sup>. Anal. Calcd. for C<sub>22</sub>H<sub>12</sub>N<sub>3</sub>O<sub>3</sub>Re: C, 47.82; H, 2.19; N, 7.60. Found: C, 47.21; H, 2.12; N, 7.55.

**Re(5-*ph*-*phen*)(CO)<sub>3</sub>(CN).** An ethanol/water mixture (2:1 v/v, 100 mL) containing *fac*-[Re(5-*ph*-*phen*)(CO)<sub>3</sub>Cl] (0.281 g, 0.5 mmol) and KCN (0.65 g, 10 mmol) was refluxed under a N<sub>2</sub> atmosphere for 24 h. During the reaction, the yellow suspension clarified and became orange. TLC analysis revealed a new spot with R<sub>f</sub> = 0.8 and no evidence of the starting materials (silica gel and

ethyl acetate). The solution was reduced to dryness *in vacuo* and the resultant yellow crude product was extracted several times with water and diethyl ether. The yellow solid was allowed to air-dry (yield = 99%). (400 MHz, CDCl<sub>3</sub>)  $\delta$  ppm = 9.39 (s, 2H), 8.53 (m,  $J$  = 5.6 Hz, 2H), 7.96 (s, 1H), 7.87 (m,  $J$  = 5.2 Hz, 1H), 7.79 (m, 1H), 7.59 (m, 3H), 7.52 (t,  $J$  = 5.6 Hz, 2H). IR (KBr):  $\nu_{\text{C}\equiv\text{N}}$  = 2119 cm<sup>-1</sup>;  $\nu_{\text{C}=\text{O}}$  = 2017 and 1886 cm<sup>-1</sup>. ESI-MS (+ve mode):  $m/z$  576.1 {[Re(*5-ph-phen*)(CO)<sub>3</sub>(CN)]•Na}<sup>+</sup>. Anal. Calcd. for C<sub>22</sub>H<sub>12</sub>N<sub>3</sub>O<sub>3</sub>Re: C, 47.82; H, 2.19; N, 7.60. Found: C, 47.99; H, 2.21; N, 7.65.

**Re(*bpy*)(CO)<sub>3</sub>(CN).** The synthesis of Re(*bpy*)(CO)<sub>3</sub>(CN) was the same as that of Re(*5-ph-phen*)(CO)<sub>3</sub>(CN) except that *fac*-[Re(*bpy*)(CO)<sub>3</sub>Cl] (0.231 g, 0.5 mmol) was used instead of *fac*-[Re(*5-ph-phen*)(CO)<sub>3</sub>Cl]. During the reaction, the yellow suspension clarified and became pale yellow. The complex was isolated as an air-stable yellow solid (yield = 98 %). (400 MHz, CDCl<sub>3</sub>)  $\delta$  ppm = 9.09 (d,  $J$  = 4.8 Hz, 2H), 8.23 (d,  $J$  = 8.4 Hz, 2H), 8.09 (m,  $J$  = 6.4 Hz, 2H), 7.56 (m,  $J$  = 6.0 Hz, 2H). IR (KBr):  $\nu_{\text{C}\equiv\text{N}}$  = 2115 cm<sup>-1</sup>;  $\nu_{\text{C}=\text{O}}$  = 2021 and 1894 cm<sup>-1</sup>. ESI-MS (+ve mode):  $m/z$  453.9 {[Re(*bpy*)(CO)<sub>3</sub>(CN)]•H}<sup>+</sup>. Anal. Calcd. for C<sub>14</sub>H<sub>8</sub>N<sub>3</sub>O<sub>3</sub>Re: C, 37.17; H, 1.78; N, 9.29. Found: C, 37.33; H, 1.84; N, 9.31.

**[Re(*5-ph-phen*)(CO)<sub>3</sub>(CN)]–[Pt(DMSO)(Cl)<sub>2</sub>] (2).** The synthesis of [Re(*5-ph-phen*)(CO)<sub>3</sub>(CN)]–[Pt(DMSO)(Cl)<sub>2</sub>] was the same as that of complex **1** except that Re(*5-ph-phen*)(CO)<sub>3</sub>(CN)<sup>11</sup> (0.110 g, 0.2 mmol) was used instead of Re(*biq*)(CO)<sub>3</sub>(CN). Complex **2** was formed in a methanol/chloroform mixture (1:1, 80 mL). The complex was isolated as an air-stable yellow solid in good yield (98%). (400 MHz, CDCl<sub>3</sub>)  $\delta$  ppm = 9.32 (t,  $J$  = 4.8 Hz, 2H), 8.58 (m,  $J$  = 8.4 Hz, 2H), 7.93 (m,  $J$  = 8.0 Hz, 2H), 7.83 (m,  $J$  = 5.2 Hz, 1H), 7.53 (m,  $J$  = 5.6 Hz, 5H), 3.28 (s, 6H). IR (KBr):  $\nu_{\text{C}\equiv\text{N}}$  = 2169 cm<sup>-1</sup>;  $\nu_{\text{C}=\text{O}}$  = 2029 and 1899 cm<sup>-1</sup>. ESI-MS (+ve mode):  $m/z$  919.5 {[Re(*5-ph-phen*)(CO)<sub>3</sub>(CN)]–[Pt(DMSO)Cl<sub>2</sub>]•Na}<sup>+</sup>. TLC: silica gel and ethyl acetate/hexane (3:1), R<sub>f</sub> = 0.55. Anal. Calcd. for C<sub>24</sub>H<sub>18</sub>Cl<sub>2</sub>N<sub>3</sub>O<sub>4</sub>PtReS: C, 32.14; H, 2.02; N, 4.69. Found: C, 32.44; H, 2.04; N,

4.76.

**[Re(*bpy*)(CO)<sub>3</sub>(CN)]–[Pt(DMSO)(Cl)<sub>2</sub>] (3).** The synthesis of [Re(*bpy*)(CO)<sub>3</sub>(CN)]–[Pt(DMSO)(Cl)<sub>2</sub>] was the same as that of complex **1** except that Re(*bpy*)(CO)<sub>3</sub>(CN)<sup>11</sup> (0.0905 g, 0.2 mmol) was used instead of Re(*biq*)(CO)<sub>3</sub>(CN). Complex **3** was formed in a methanol/chloroform mixture (1:1, 70 mL). The complex was isolated as an air-stable yellow solid in good yield (98%). (400 MHz, CDCl<sub>3</sub>)  $\delta$  ppm = 8.99 (d, *J* = 4.8 Hz, 2H), 8.20–8.29 (m, 2H), 8.10–8.18 (m, 2H), 7.52–7.63 (m, 2H), 3.35 (s, 6H). IR (KBr):  $\nu_{\text{C}\equiv\text{N}}$  = 2180 cm<sup>–1</sup>;  $\nu_{\text{C}=\text{O}}$  = 2022 and 1907 cm<sup>–1</sup>. ESI-MS (+ve mode): *m/z* 819.5 {[Re(*bpy*)(CO)<sub>3</sub>(CN)]–[Pt(DMSO)Cl<sub>2</sub>]•Na}<sup>+</sup>. TLC: silica gel and ethyl acetate/hexane (3:1), *R<sub>f</sub>* = 0.55. Anal. Calcd. for C<sub>16</sub>H<sub>14</sub>Cl<sub>2</sub>N<sub>3</sub>O<sub>4</sub>PtReS: C, 24.13; H, 1.77; N, 5.28. Found: C, 24.08; H, 1.75; N, 5.21.

**X-Ray Crystal Structure of Complex 1.** A perspective of complex **1** with atom labeling is depicted in Figure 1. The two metal centers in the complex adopt a linear configuration with one Pt(DMSO)Cl<sub>2</sub> moiety bridged to the Re(I) centre via cyano linkages. The coordination geometry of the Pt(II) center is square planar with a *cis* orientation of the two chloro ligands and DMSO coordinated to the cyano nitrogen atom. The bond distances between the Pt(II) center and cyano nitrogen atom and between the cyano carbon and nitrogen atoms are 2.04(2) and 1.09(3) Å, respectively, and are consistent with the normal bond lengths for metal–C≡N–Pt complexes [the reported bond distances between Pt and cyano nitrogen are 1.98(15) to 2.00(10) Å and those between cyano carbons and nitrogens are 1.15(15) to 1.20(11) Å].<sup>8</sup> The Re–C≡N–Pt bridges deviate slightly from linearity with bond angles of 174.4(18)° at Re–C≡N and 177.7(17)° at C≡N–Pt. The crystal data and other X-ray crystallographic experimental details are summarized in Table S2. Selected bond distances and angles are summarized in Table S3.

**UV-Vis Spectroscopic and Spectrofluorimetric Titrations.** All solvents used for UV-vis

absorbance and spectrofluorimetric titrations were of analytical grade. The titrations were performed in chloroform, and the measurements were recorded after equilibrium was established between the receptor and substrate. The receptor-substrate interaction was determined to be 1:1 according to the Benesi-Hildebrand equations<sup>9</sup> for UV-vis absorption titration (Eq. 1), as follows:

$$\frac{A_0}{A - A_0} = \left( \frac{\epsilon_0}{\epsilon_0 - \epsilon} \right) \left( \frac{1}{K_{\text{overall}}[\text{substrate}]} + 1 \right) \quad \text{-----} \quad (1)$$

where  $A_0$  and  $A$  are the absorbance of the chromogenic reagent in the absence and presence of the substrate, respectively, and  $\epsilon_0$  and  $\epsilon$  are the corresponding molar absorption coefficients of the chromogenic reagent in the absence and presence of the substrate, respectively. The formation constants ( $K_{\text{overall}}$ ) were estimated from the ratio between the y-intercept and slope of the straight lines obtained by plotting  $A_0/(A - A_0)$  vs.  $[\text{substrate}]^{-1}$  assuming a 1:1 host-guest interaction. The energies of formation ( $\Delta G^\circ/\text{kJ mol}^{-1}$ ) of the donor-acceptor ensembles and acceptor metal-analyte adducts were evaluated from the corresponding formation constants, as stated in Eq. 2,<sup>9</sup> in which  $R$  is the gas constant and  $T$  is the temperature at which the experiments were conducted.

$$\Delta G^\circ = -RT \ln(K_{\text{overall}}) \quad \text{-----} \quad (2)$$

The detection limits were estimated from the ratio in Eq. 3 using the statistic from Student's  $t$  distribution table and the standard deviation of the relative luminescence intensity (s.d.):

$$\text{Detection Limit} = (t)(\text{s.d.}) \quad \text{-----} \quad (3)$$

**Formation Constants of  $[\text{Re}(\text{Lig})(\text{CO})_3(\text{CN})]$ - $[\text{Pt}(\text{DMSO})(\text{Cl})_2]$  Adducts.** UV-Vis absorbance and spectrofluorimetric titrations of solutions of  $[\text{Re}(\text{Lig})(\text{CO})_3(\text{CN})]$  ( $\text{Lig} = \text{biq}$ ,  $5\text{-ph-phen}$  and  $\text{bpy}$ ,  $1 \times 10^{-4}$  M) by  $\text{Pt}(\text{DMSO})_2(\text{Cl})_2$  (0 to  $3 \times 10^{-4}$  M) were performed in a methanol/chloroform

mixture (1:1). The formation constants of the  $[\text{Re}(\text{Lig})(\text{CO})_3(\text{CN})]\text{-}[\text{Pt}(\text{DMSO})(\text{Cl})_2]$  adducts were determined by fitting the titration curves with the 1:1 Benesi-Hildebrand equation (Eq. 1).

**Formation Constants of  $[\text{Pt}(\text{analyte})(\text{DMSO})\text{Cl}_2]$  Adducts.** UV-Vis absorbance spectroscopic titrations of solutions of  $\text{Pt}(\text{DMSO})_2(\text{Cl})_2$  ( $1 \times 10^{-4}$  M) and  $\text{Pt}(\text{DMSO})_2(\text{Cl})_2$  ( $3 \times 10^{-4}$  M) by sulfide-containing analytes (dimethyl sulfide, dimethyl disulfide, dimethyl trisulfide, and  $\text{H}_2\text{S}$ ) ( $0$  to  $5 \times 10^{-4}$  M) and other BVC analytes (propanoic acid, 4-ethylphenol, triethylamine, CO,  $\text{CH}_4$ , and  $\text{N}_2$ ) ( $0$  to  $2 \times 10^{-1}$  M), respectively, were carried out in a methanol/chloroform mixture (1:1). The formation constants of the  $[\text{Pt}(\text{analyte})(\text{DMSO})\text{Cl}_2]$  adducts were analyzed by fitting the titration curves with the 1:1 Benesi-Hildebrand equation (Eq. 1). Gibbs free energy changes ( $\Delta G^\circ$ ) were analyzed by fitting  $K_{\text{overall}}$  with Eq. 2.

**Selectivity of Complexes 1–3 toward Various Analytes.** A series of BVCs (dimethyl sulfide, dimethyl disulfide, dimethyl trisulfide, propanoic acid, 4-ethylphenol, triethylamine,  $\text{H}_2\text{S}$ , CO,  $\text{CH}_4$ , and  $\text{N}_2$ ) ( $0$  to  $5 \times 10^{-4}$  M) were mixed with solutions of complexes **1–3** ( $1 \times 10^{-4}$  M). The titrations were performed in chloroform at room temperature. The UV-Vis absorbance and spectrofluorimetric changes of the resulting mixtures were plotted as a function of the mole fraction of the analyte. The luminescent responses of complex **1** to the analytes were also recorded by digital photography.

**Detection Limits of Complex 1 toward Dimethyl Sulfide.** A series of ten chloroform solutions of **1** ( $1 \times 10^{-4}$  M) were mixed with a fixed known concentration of dimethyl sulfide. The changes in the emissions of the resultant mixtures were recorded. The detection limits were calculated using Eq. 3.

## Reference

1. Pfennig, B. W.; Chen, P.; Meyer, T. J. *Inorg. Chem.* **1996**, *35*, 2898.
2. (a) Leasure, R. M.; Sacksteder, L.; Nesselrodt, D.; Reitz, G. A.; Demas, J. N.; DeGraff, B. A. *Inorg. Chem.* **1991**, *30*, 3722–3728; (b) Takeda, H.; Koike, K.; Inoue, H.; Ishitani, O. *J. Am. Chem. Soc.* **2008**, *130*, 2023–2031.
3. Prices, J. H.; Williamson, A. N.; Schramln R. F.; Wayland, B. B. *Inorg. Chem.*, **1972**, *11*, 1280.
4. CrystalClear, Version 1.3.5; Rigaku Corp., Woodlands, TX, 1999.
5. Demas, J. N.; Crosby, G. A. *J. Phys. Chem.*, **1971**, *75*, 991.
6. Nakamaru, K. *Bull. Chem. Soc. Jpn.*, **1982**, *55*, 2697.
7. Sheldrick, G. M. SHELXTL, Crystallographic Software Package, Version 5.1; Bruker-AXS, Madison, WI, 1998.
8. (a) Chae, M. Y.; Czarnik, A. W. *J. Am. Chem. Soc.*, **1992**, *114*, 9704; (b) Czarnik, A. W.; Dujols V.; Ford, F. *J. Am. Chem. Soc.*, **1997**, *119*, 7386.
9. Connors, K. A. *Binding Constants, The Measurement of Molecular Complexes Stability*; John Wiley and Sons: New York, 1987.

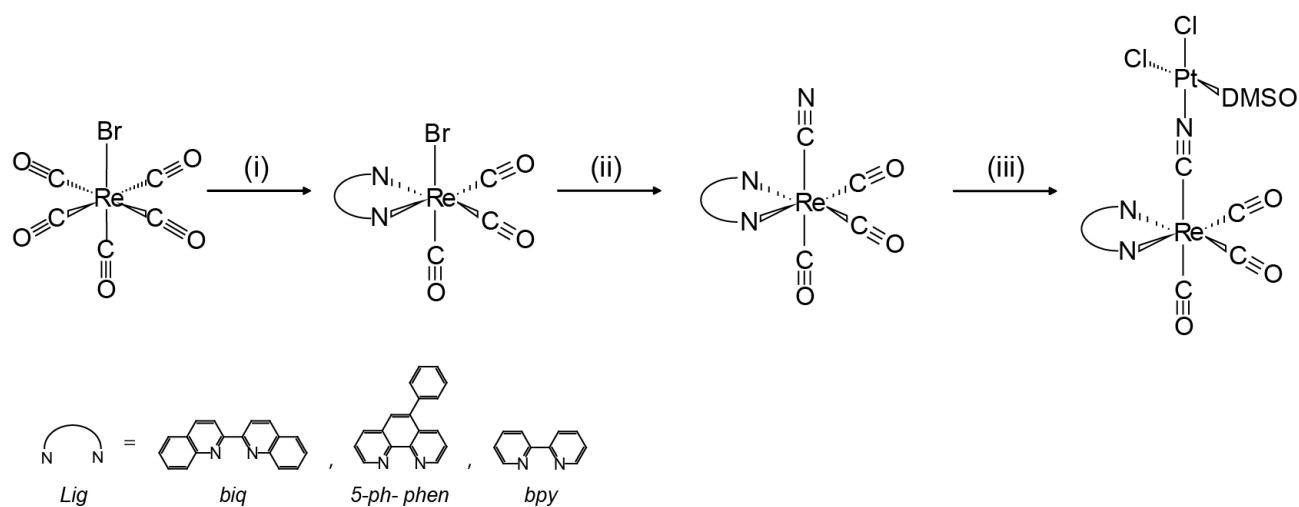

**Scheme S1.** Synthesis of  $[\text{Re}(\text{Lig})(\text{CO})_3(\text{CN})]-[\text{Pt}(\text{DMSO})(\text{Cl})_2]$  (**1–3**). Reaction conditions: (i) Reflux with appropriate ligand (*biq*, *5-ph-phen* or *bpy*) in toluene; (ii) reflux with one equivalent of NaCN in aqueous acetone; (iv) stir with one equivalent of  $[\text{Pt}(\text{DMSO})_2\text{Cl}_2]$  in a methanol/chloroform mixture (1:1) in open atmosphere at room temperature.

**Table S1.** IR spectroscopic properties of *fac*-[Re(*Lig*)(CO)<sub>3</sub>(CN)] and [Re(*Lig*)(CO)<sub>3</sub>(CN)]–[Pt(DMSO)(Cl)<sub>2</sub>] [*Lig*: *biq* (**1**), *5-ph-phen* (**2**) and *bpy* (**3**)] complexes.

| Complex                                         | IR                               |                                   |
|-------------------------------------------------|----------------------------------|-----------------------------------|
|                                                 | $\nu_{C\equiv N}/\text{cm}^{-1}$ | $\nu_{C\equiv O} \text{ cm}^{-1}$ |
| <b>Re(<i>biq</i>)(CO)<sub>3</sub>(CN)</b>       | 2122 (w)                         | 2010 (s), 1893 (s)                |
| <b>Re(<i>5-ph-phen</i>)(CO)<sub>3</sub>(CN)</b> | 2119 (w)                         | 2017 (s), 1886 (s)                |
| <b>Re(<i>bpy</i>)(CO)<sub>3</sub>(CN)</b>       | 2115 (w)                         | 2021 (s), 1894 (s)                |
| <b>(1)</b>                                      | 2169 (w)                         | 2022 (s), 1903 (s)                |
| <b>(2)</b>                                      | 2169 (w)                         | 2029 (s), 1899 (s)                |
| <b>(3)</b>                                      | 2180 (w)                         | 2022 (s), 1907 (s)                |

<sup>a</sup>The infrared spectra were obtained with KBr pellets; “w” represents a weak transmission while “s” represents a strong transmission.

**Table S2.** Crystallographic data for [Re(*biq*)(CO)<sub>3</sub>(CN)]–[Pt(DMSO)(Cl)<sub>2</sub>] (1).

|                                                              |                                                                                     |
|--------------------------------------------------------------|-------------------------------------------------------------------------------------|
| Empirical formula                                            | C <sub>24</sub> H <sub>18</sub> Cl <sub>2</sub> N <sub>3</sub> O <sub>4</sub> PtReS |
| Formula weight                                               | 896.66                                                                              |
| Temperature, K                                               | 276(2)                                                                              |
| Wavelength, Å                                                | 0.71073                                                                             |
| Crystal system                                               | Triclinic                                                                           |
| Space group                                                  | <i>P</i> $\bar{1}$                                                                  |
| <i>a</i> , Å                                                 | 8.9082(12)                                                                          |
| <i>b</i> , Å                                                 | 10.0279(14)                                                                         |
| <i>c</i> , Å                                                 | 15.453(2)                                                                           |
| $\alpha$ , deg                                               | 79.764(3)                                                                           |
| $\beta$ , deg                                                | 85.457(3)                                                                           |
| $\gamma$ , deg                                               | 88.478(3)                                                                           |
| Volume, Å <sup>3</sup>                                       | 1354.1(3)                                                                           |
| <i>Z</i>                                                     | 2                                                                                   |
| Density (calculated), mg m <sup>-3</sup>                     | 2.199                                                                               |
| Absorption coefficient, mm <sup>-1</sup>                     | 9.935                                                                               |
| <i>F</i> (000)                                               | 836                                                                                 |
| Crystal dimensions, mm                                       | 0.30 × 0.20 × 0.10                                                                  |
| $\theta$ range for data collection, deg                      | 1.34 to 25.25                                                                       |
| Limiting indices                                             | <i>h</i> : –8 to 10; <i>k</i> : –12 to 12; <i>l</i> : –18 to 18                     |
| Reflections collected                                        | 21363                                                                               |
| Unique reflections                                           | 4888                                                                                |
| <i>R</i> <sub>int</sub>                                      | 0.1781                                                                              |
| Completeness to $\theta = 25.25^\circ$ , %                   | 99.6                                                                                |
| Max. and min. transmission                                   | 0.7419 and 0.4619                                                                   |
| Data/restraints/parameters                                   | 4888/0/325                                                                          |
| Goodness-of-fit on <i>F</i> <sup>2</sup>                     | 0.999                                                                               |
| Final <i>R</i> indices [ <i>I</i> > 2 $\sigma$ ( <i>I</i> )] | <i>R</i> <sub>1</sub> = 0.0727, <i>wR</i> <sub>2</sub> = 0.1621                     |
| <i>R</i> indices (all data)                                  | <i>R</i> <sub>1</sub> = 0.1207, <i>wR</i> <sub>2</sub> = 0.1894                     |
| Largest different peak and hole, eÅ <sup>-3</sup>            | 1.498, –1.752                                                                       |

**Table S3.** Selected bond lengths (Å) and angles (°) of [Re(*big*)(CO)<sub>3</sub>(CN)]–[Pt(DMSO)(Cl)<sub>2</sub>] (1).

| Selected Bond Lengths (Å) |           |                   |           |
|---------------------------|-----------|-------------------|-----------|
| Re(1)–N(1)                | 2.211(13) | Pt(1)–N(3)        | 2.04(2)   |
| Re(1)–N(2)                | 2.220(15) | Pt(1)–S(1)        | 2.212(5)  |
| Re(1)–C(19)               | 1.91(2)   | Pt(1)–Cl(1)       | 2.296(5)  |
| Re(1)–C(20)               | 1.899(19) | Pt(1)–Cl(2)       | 2.325(6)  |
| Re(1)–C(21)               | 1.92(3)   | C(19)–O(1)        | 1.14(2)   |
| Re(1)–C(22)               | 2.092(17) | C(20)–O(2)        | 1.14(2)   |
| C(22)–N(3)                | 1.09(3)   | C(21)–O(3)        | 1.13(3)   |
| Selected Bond angles (°)  |           |                   |           |
| Re(1)–C(22)–N(3)          | 174.4(18) | C(22)–N(3)–Pt(1)  | 177.7(17) |
| C(20)–Re(1)–C(19)         | 91.5(9)   | Cl(1)–Pt(1)–Cl(2) | 90.9(2)   |
| C(20)–Re(1)–C(21)         | 86.4(9)   | Cl(1)–Pt(1)–N(3)  | 87.2(5)   |
| C(19)–Re(1)–C(21)         | 90.4(10)  | N(3)–Pt(1)–S(1)   | 92.0(5)   |
| C(19)–Re(1)–C(22)         | 178.4(9)  | S(1)–Pt(1)–Cl(2)  | 89.9(2)   |

**Table S4.** Electronic absorption and photoluminescence data for *fac*-[Re(*Lig*)(CO)<sub>3</sub>(CN)] and [Re(*Lig*)(CO)<sub>3</sub>(CN)]–[Pt(DMSO)(Cl)<sub>2</sub>] [*Lig*: *biq* (**1**), *5-ph-phen* (**2**), and *bpy* (**3**)] complexes at 298 K.

| Complex                                      | Medium            | $\lambda_{\text{abs}}/\text{nm}$ ( $\epsilon/\text{dm}^3 \text{ mol}^{-1} \text{ cm}^{-1}$ ) | Emission $\lambda/\text{nm}$<br>(quantum yield $\phi$ ) |
|----------------------------------------------|-------------------|----------------------------------------------------------------------------------------------|---------------------------------------------------------|
| Re( <i>biq</i> )(CO) <sub>3</sub> (CN)       | CHCl <sub>3</sub> | 267 (58225), 356 (22650),<br>375 (33850), 431 (6450)                                         | 675 ( $3 \times 10^{-4}$ )                              |
|                                              | MeCN              | 264 (58675), 354 (22575),<br>372 (33100), 420sh (6675)                                       | 669 ( $5 \times 10^{-5}$ )                              |
| Re( <i>5-ph-phen</i> )(CO) <sub>3</sub> (CN) | CHCl <sub>3</sub> | 281 (28100), 382sh (8725)                                                                    | 551 (0.093)                                             |
|                                              | MeCN              | 281 (32925), 370sh (8950)                                                                    | 567 (0.016)                                             |
| Re( <i>bpy</i> )(CO) <sub>3</sub> (CN)       | CHCl <sub>3</sub> | 241 (57000), 287 (22275),<br>371 (20525)                                                     | 559 (0.052)                                             |
|                                              | MeCN              | 245 (23225), 315 (14175),<br>351 (7725)                                                      | 574 (0.028)                                             |
| <b>1</b>                                     | CHCl <sub>3</sub> | 267 (47875), 358 (18900),<br>377 (26350), 426sh (5975)                                       | 651 ( $8 \times 10^{-4}$ )                              |
|                                              | MeCN              | 266 (50800), 356 (19975),<br>373 (27100), 423sh (5650)                                       | 652 ( $4 \times 10^{-4}$ )                              |
| <b>2</b>                                     | CHCl <sub>3</sub> | 287 (29500), 378sh (7300)                                                                    | 540 (0.088)                                             |
|                                              | MeCN              | 285 (34100), 373sh (7625)                                                                    | 549 (0.014)                                             |
| <b>3</b>                                     | CHCl <sub>3</sub> | 287 (21125), 319 (13675),<br>360sh (8625)                                                    | 542 (0.005)                                             |
|                                              | MeCN              | 243 (30375), 316 (16725),<br>351sh (8700)                                                    | 555 (0.004)                                             |

<sup>a</sup>Emission quantum yields of  $\lambda_{\text{em}} = 400\text{--}700 \text{ nm}$ ,  $\lambda_{\text{ex}} = 363\text{--}432 \text{ nm}$ ; <sup>b</sup> $\phi$  were measured using aerated CHCl<sub>3</sub> or acetonitrile solutions of [Ru(*bpy*)<sub>3</sub>]Cl<sub>2</sub> as the standard.

**Table S5.** Binding constants ( $\log K_{overall}$ ) and Gibbs free energy changes ( $\Delta G^\circ$ ) for complexation of various BVCs and  $\text{Re}(\text{Lig})(\text{CO})_3(\text{CN})$  with  $\text{Pt}(\text{DMSO})_2\text{Cl}_2$ .

|    | Acceptor                              | Donor                                           | $\log K_{overall}^b$ | $\Delta G^\circ$<br>/kJmol <sup>-1</sup> |
|----|---------------------------------------|-------------------------------------------------|----------------------|------------------------------------------|
| 1  | $\text{Pt}(\text{DMSO})_2\text{Cl}_2$ | <b>Re(<i>bpy</i>)(CO)<sub>3</sub>(CN)</b>       | 4.01                 | −22.9                                    |
| 2  | $\text{Pt}(\text{DMSO})_2\text{Cl}_2$ | <b>Re(<i>5-ph-phen</i>)(CO)<sub>3</sub>(CN)</b> | 3.98                 | −22.7                                    |
| 3  | $\text{Pt}(\text{DMSO})_2\text{Cl}_2$ | $\text{CH}_3\text{SCH}_3$                       | 3.87                 | −22.1                                    |
| 4  | $\text{Pt}(\text{DMSO})_2\text{Cl}_2$ | <b>Re(<i>biq</i>)(CO)<sub>3</sub>(CN)</b>       | 3.76                 | −21.5                                    |
| 5  | $\text{Pt}(\text{DMSO})_2\text{Cl}_2$ | $\text{CH}_3\text{SSCH}_3$                      | 3.62                 | −20.7                                    |
| 6  | $\text{Pt}(\text{DMSO})_2\text{Cl}_2$ | $\text{CH}_3\text{SSSCH}_3$                     | 3.61                 | −20.6                                    |
| 7  | $\text{Pt}(\text{DMSO})_2\text{Cl}_2$ | Carbon monoxide <sup>a</sup>                    | 1.94                 | −11.1                                    |
| 8  | $\text{Pt}(\text{DMSO})_2\text{Cl}_2$ | 4-Ethylphenol                                   | 1.58                 | −9.0                                     |
| 9  | $\text{Pt}(\text{DMSO})_2\text{Cl}_2$ | Triethylamine                                   | 0.49                 | −2.8                                     |
| 10 | $\text{Pt}(\text{DMSO})_2\text{Cl}_2$ | Propanoic acid                                  | 0.27                 | −2.5                                     |
| 11 | $\text{Pt}(\text{DMSO})_2\text{Cl}_2$ | Methane                                         | --- <sup>c</sup>     | --- <sup>c</sup>                         |
| 12 | $\text{Pt}(\text{DMSO})_2\text{Cl}_2$ | Nitrogen                                        | --- <sup>c</sup>     | --- <sup>c</sup>                         |
| 13 | $\text{Pt}(\text{DMSO})_2\text{Cl}_2$ | Air                                             | --- <sup>c</sup>     | --- <sup>c</sup>                         |

<sup>a</sup> $\log K_{overall}$  and Gibbs free energy changes are cited from the SC-Database. <sup>b</sup>All donor–acceptor binding strengths were measured by UV spectroscopic titration in a methanol/chloroform mixture (v/v 1:1), at 25 °C. <sup>c</sup>Too small to be determined.

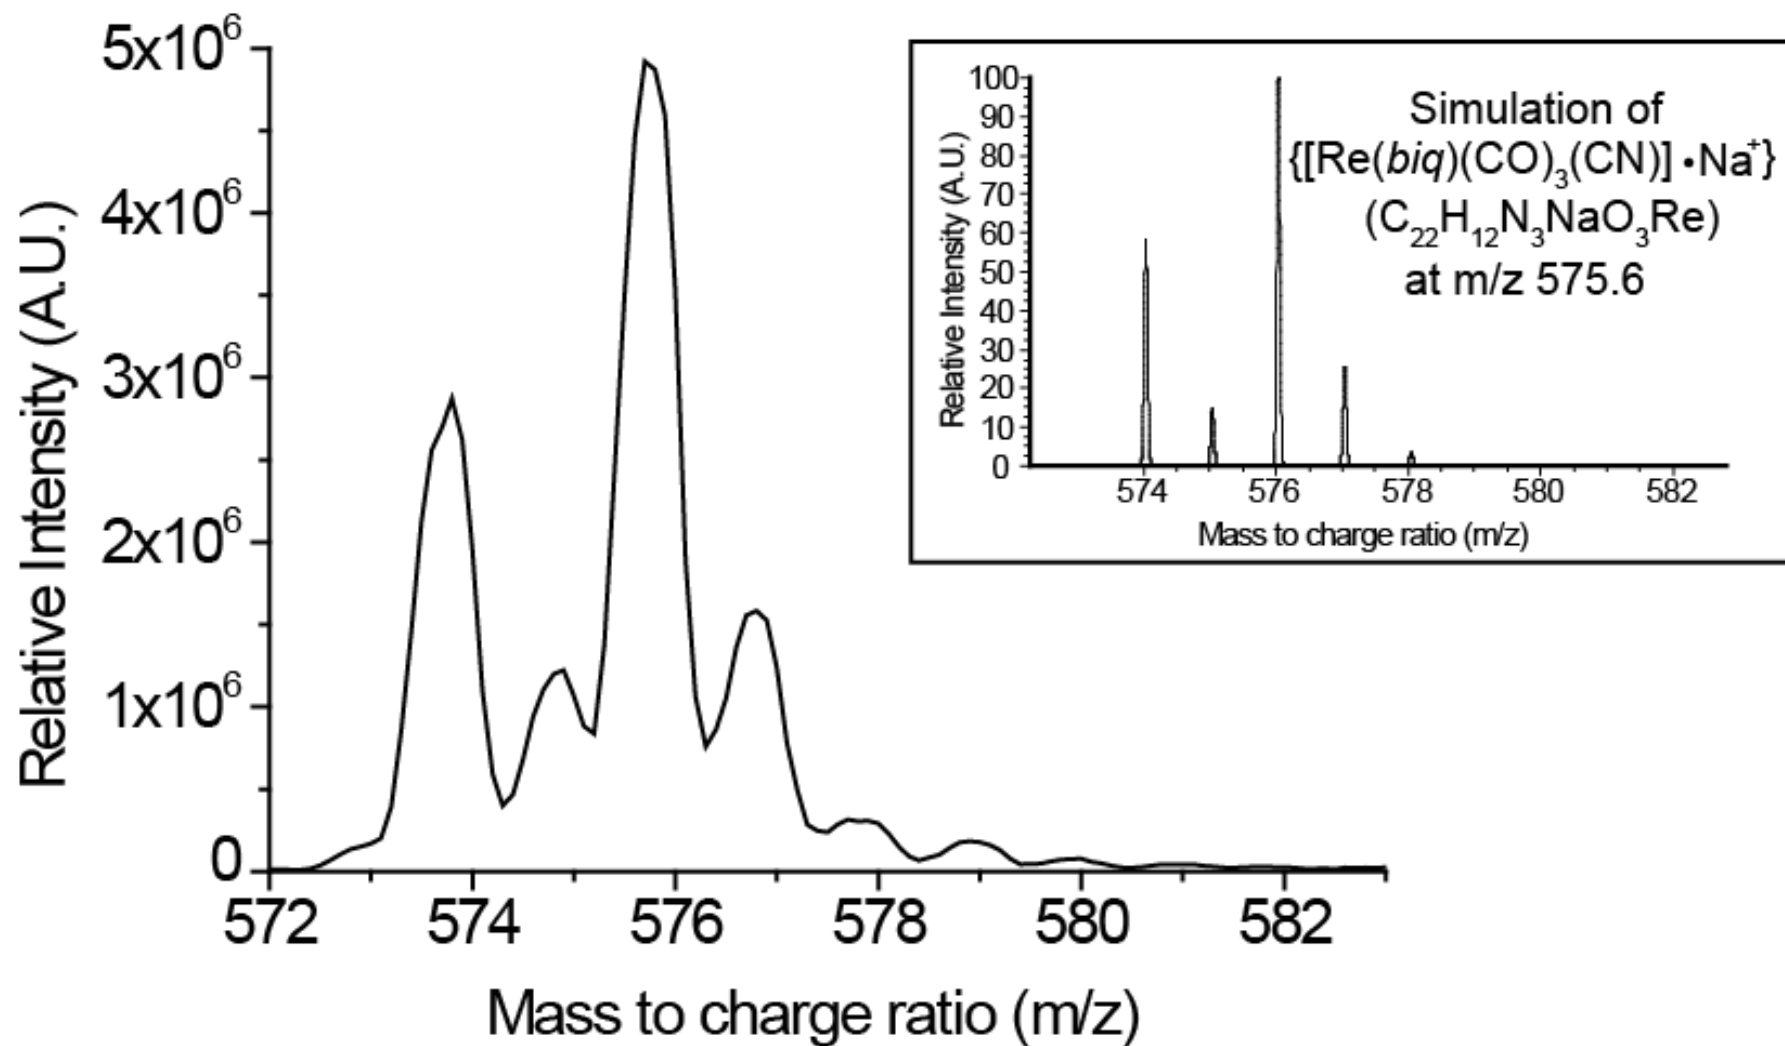

**Fig S1.** Electrospray mass spectra of the isotopic distribution of  $\text{Re}(\text{biq})(\text{CO})_3(\text{CN})$  and (**inset**) its simulation of  $\{[\text{Re}(\text{biq})(\text{CO})_3(\text{CN})] \cdot \text{Na}\}^+$  peak at 575.6. All the mass spectra were performed in methanol.

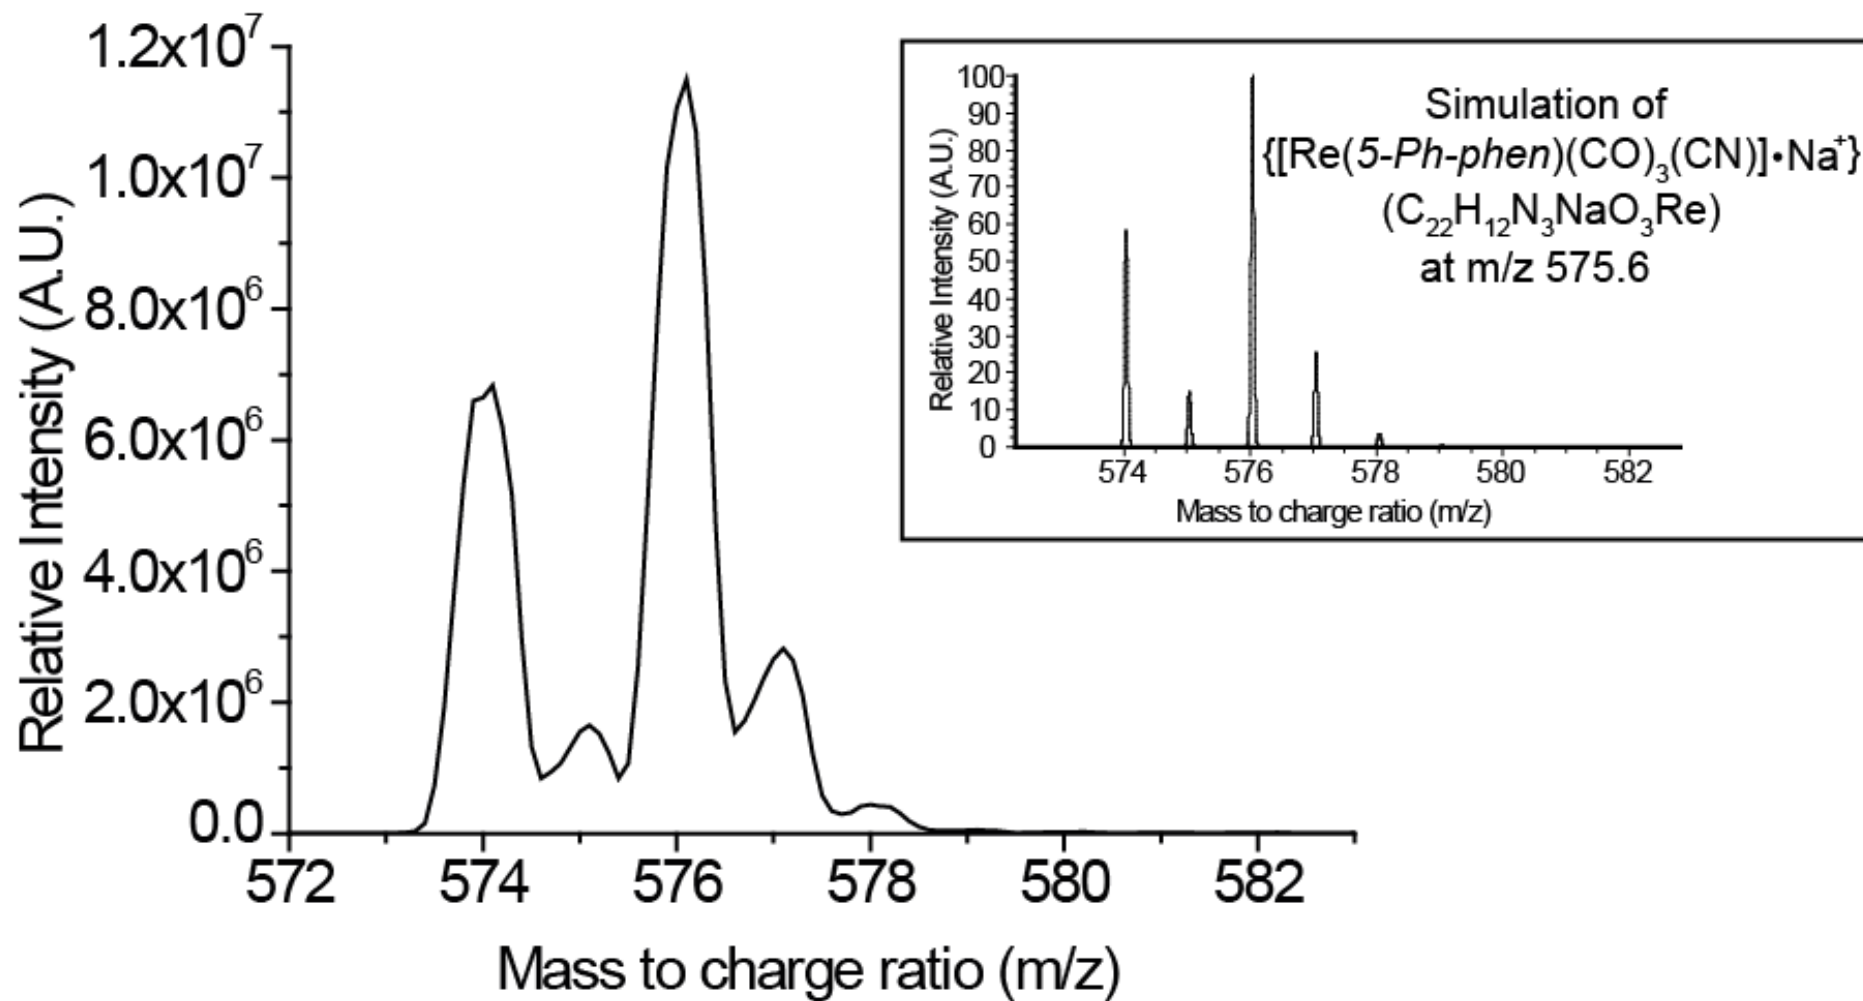

**Fig S2.** Electrospray mass spectra of the isotopic distribution of  $\text{Re}(5\text{-}ph\text{-}phen)(\text{CO})_3(\text{CN})$  and (**inset**) its simulation of  $\{[\text{Re}(5\text{-}ph\text{-}phen)(\text{CO})_3(\text{CN})]\cdot\text{Na}^+\}$  peak at 575.6. All the mass spectra were performed in methanol.

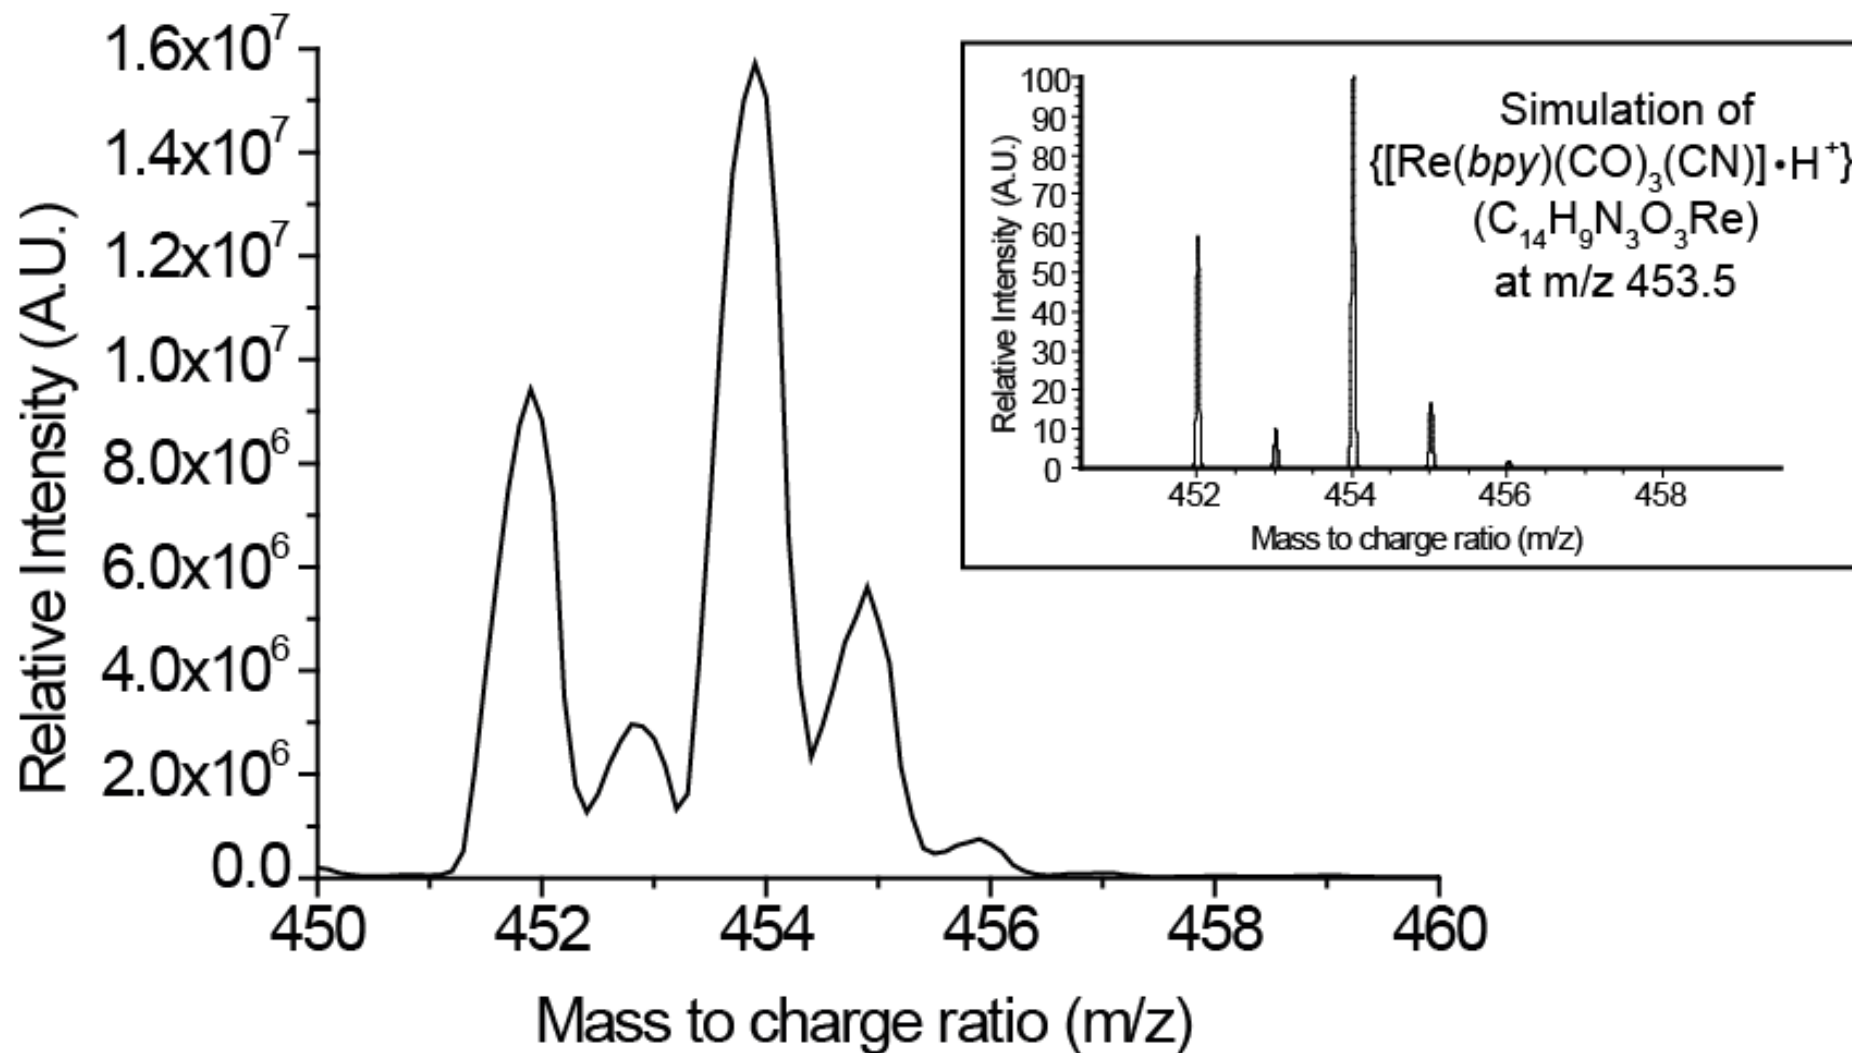

**Fig S3.** Electrospray mass spectra of the isotopic distribution of  $\text{Re}(\text{bpy})(\text{CO})_3(\text{CN})$  and (**inset**) its simulation of  $\{[\text{Re}(\text{bpy})(\text{CO})_3(\text{CN})] \cdot \text{H}^+\}^+$  peak at  $453.5$ . All the mass spectra were performed in methanol.

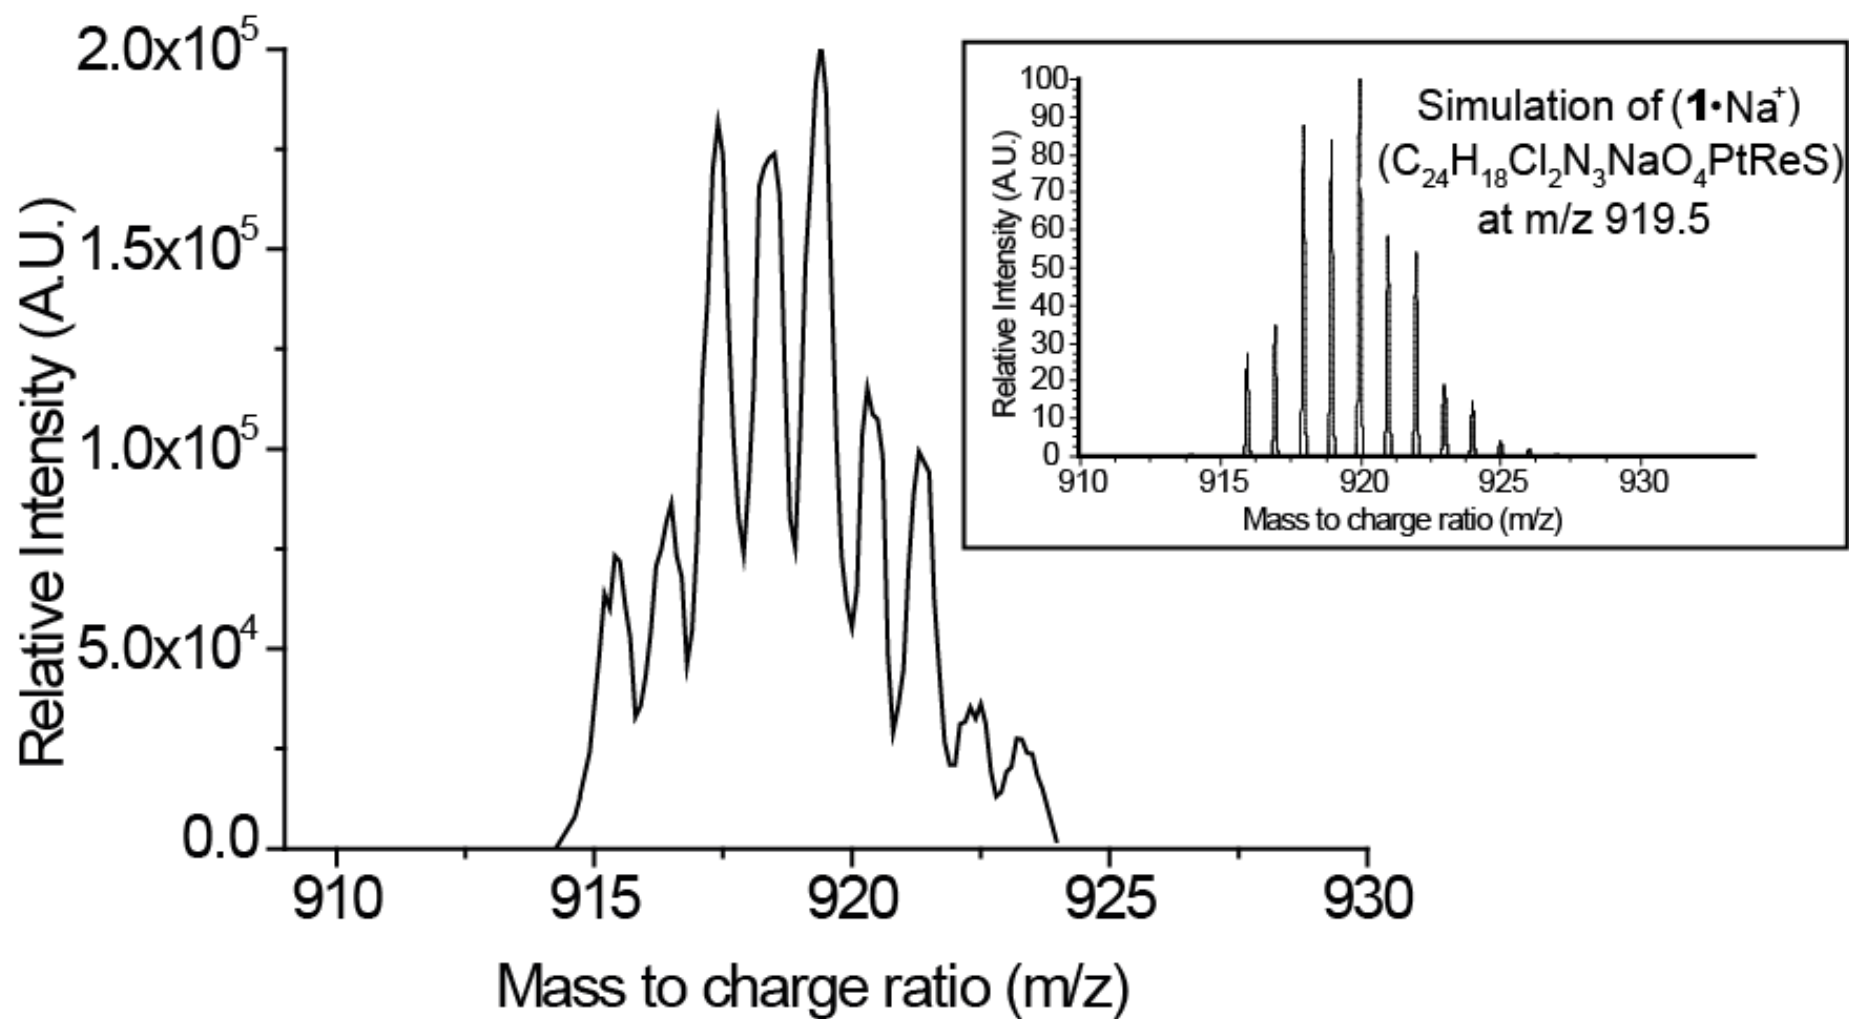

**Fig S4.** Electrospray mass spectra of the isotopic distribution of complex **1** and (**inset**) its simulation of  $\{[\text{Re}(\text{biq})(\text{CO})_3(\text{CN})]^- [\text{Pt}(\text{DMSO})\text{Cl}_2] \cdot \text{Na}\}^+$  peak at 919.5. All the mass spectra were performed in dichloromethane/methanol mixture.

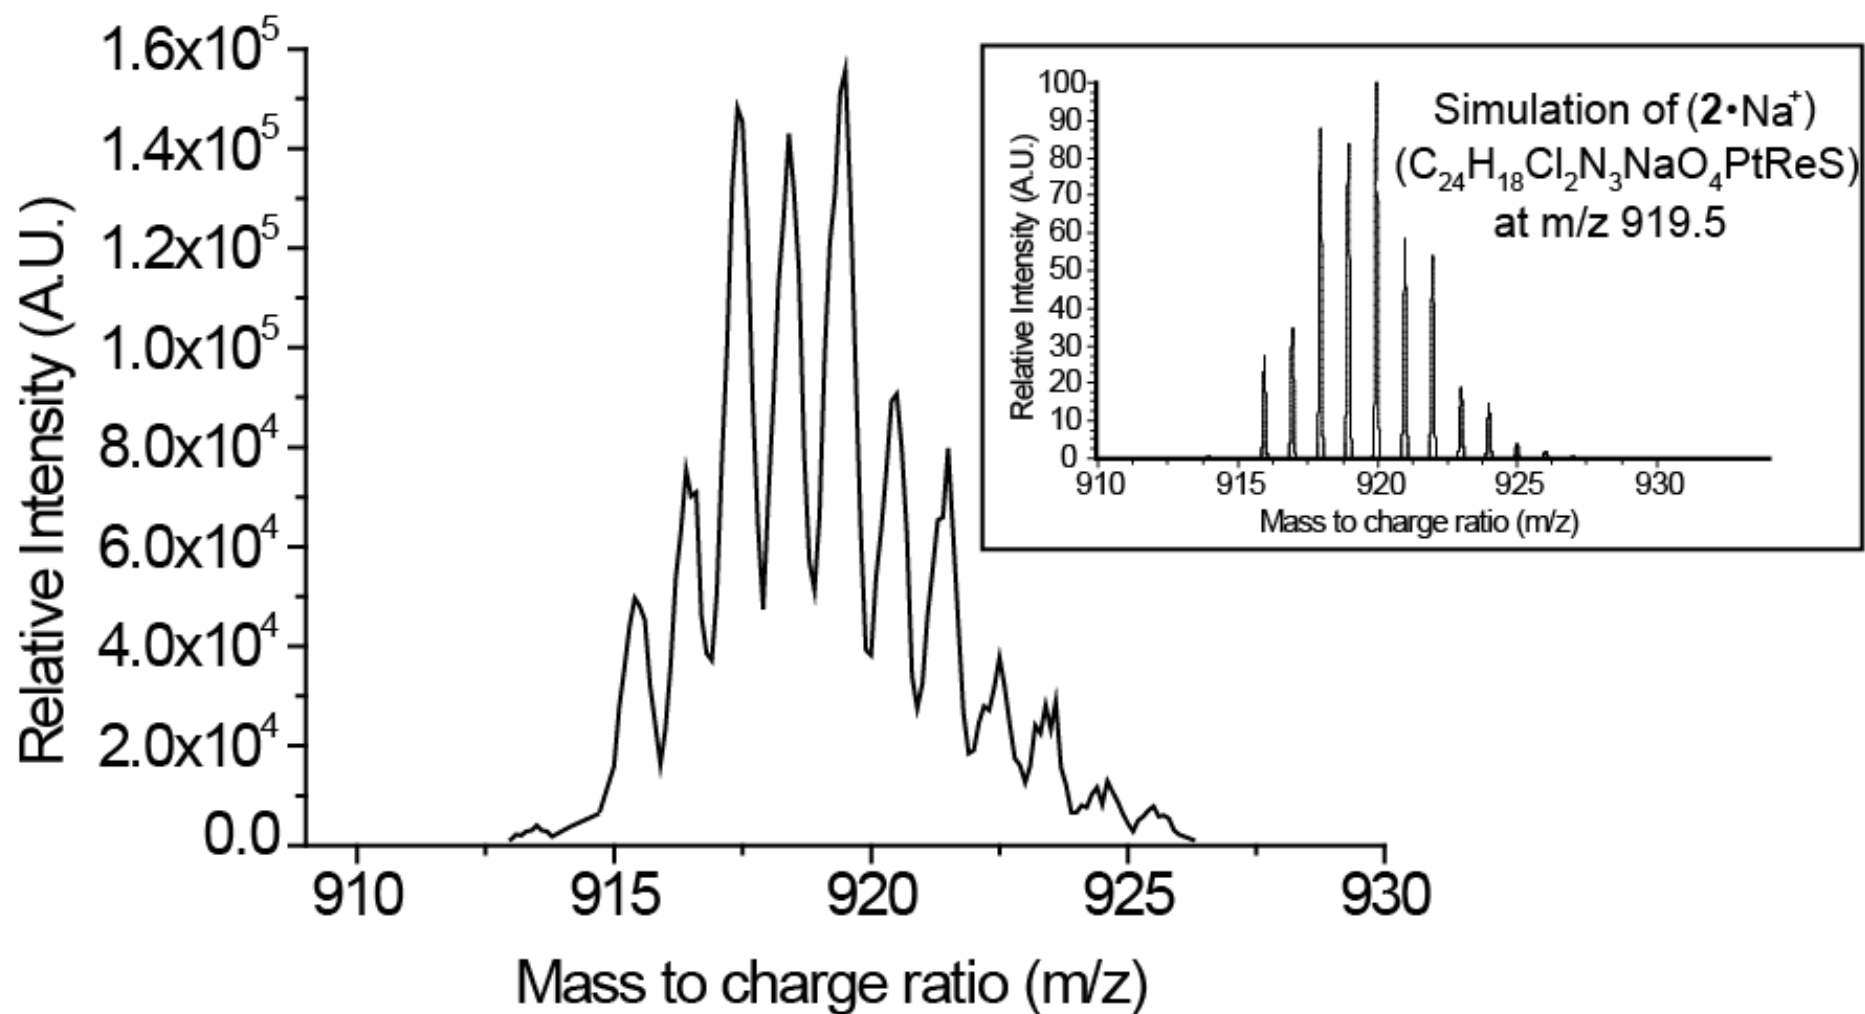

**Fig S5.** Electrospray mass spectra of the isotopic distribution of complex **2** and (**inset**) its simulation of  $\{[\text{Re}(5\text{-}ph\text{-}phen)(\text{CO})_3(\text{CN})]-[\text{Pt}(\text{DMSO})\text{Cl}_2] \cdot \text{Na}\}^+$  peak at 919.5. All the mass spectra were performed in dichloromethane/methanol mixture.

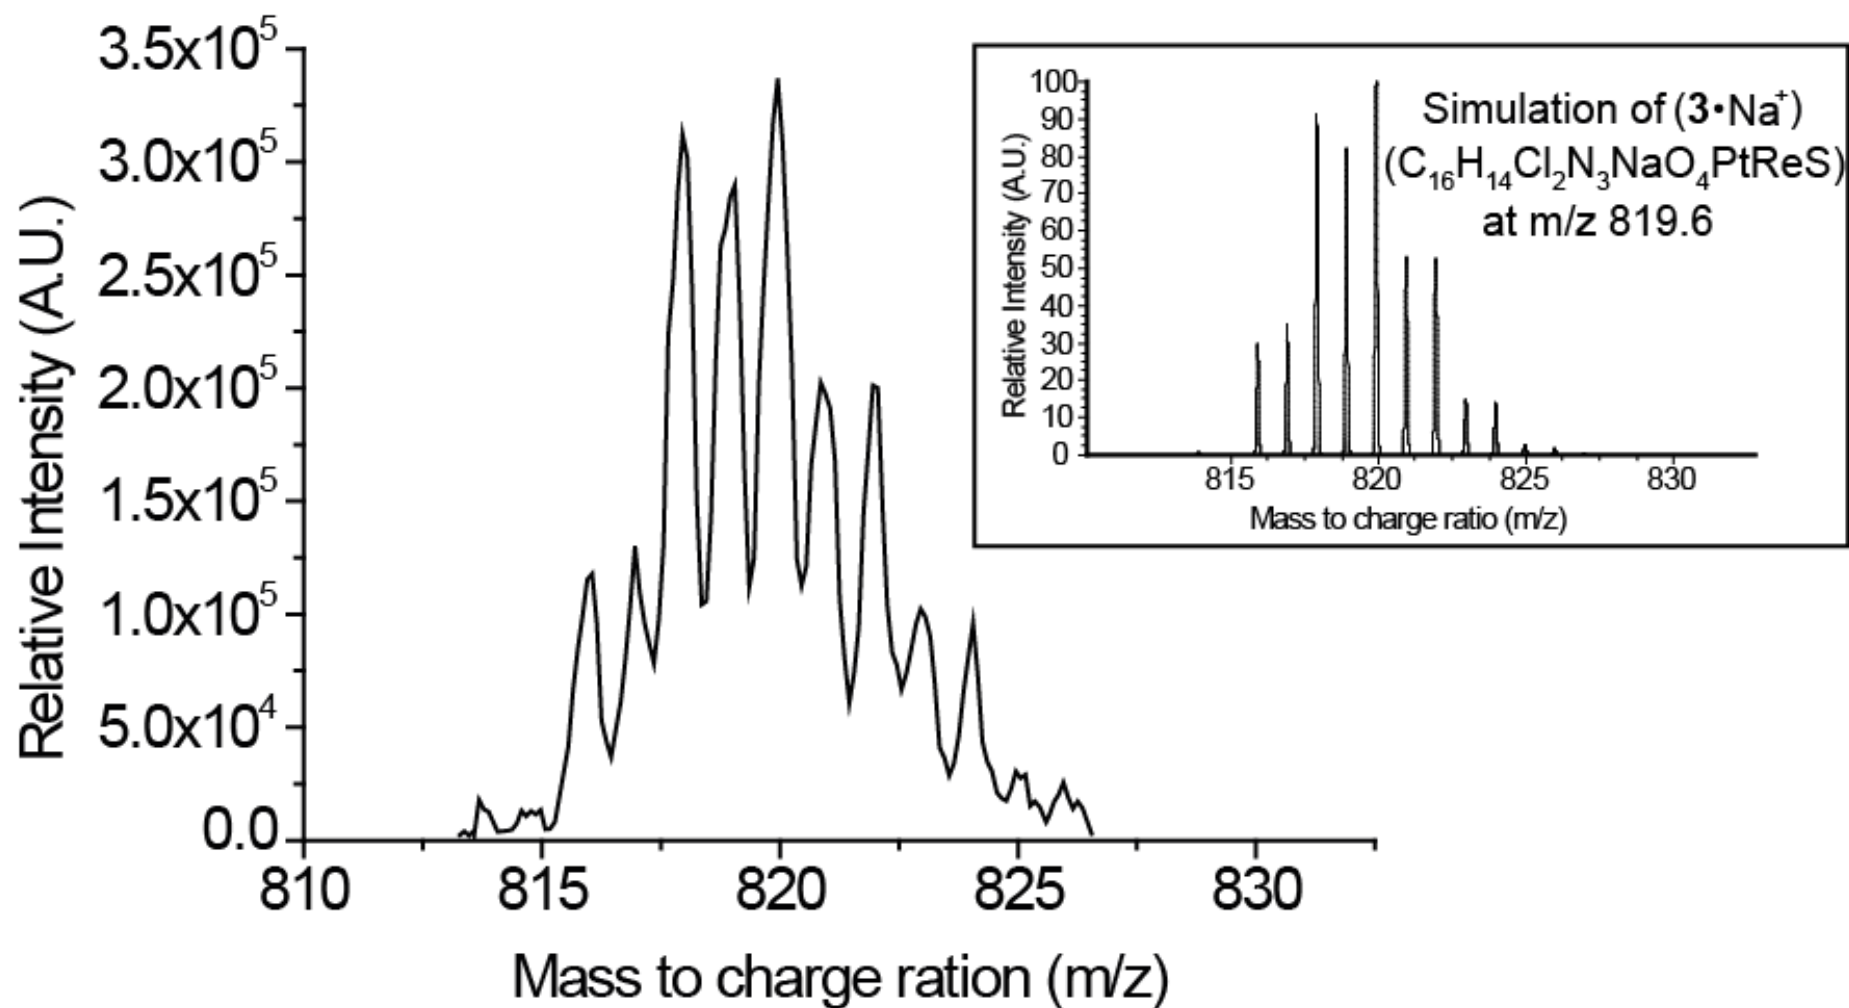

**Fig S6.** Electrospray mass spectra of the isotopic distribution of complex **3** and (**inset**) its simulation of  $\{[Re(bpy)(CO)_3(CN)]-[Pt(DMSO)Cl_2] \cdot Na\}^+$  peak at 819.6. All the mass spectra were performed in dichloromethane/methanol mixture.

Re-003-CN-2 20130124

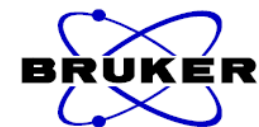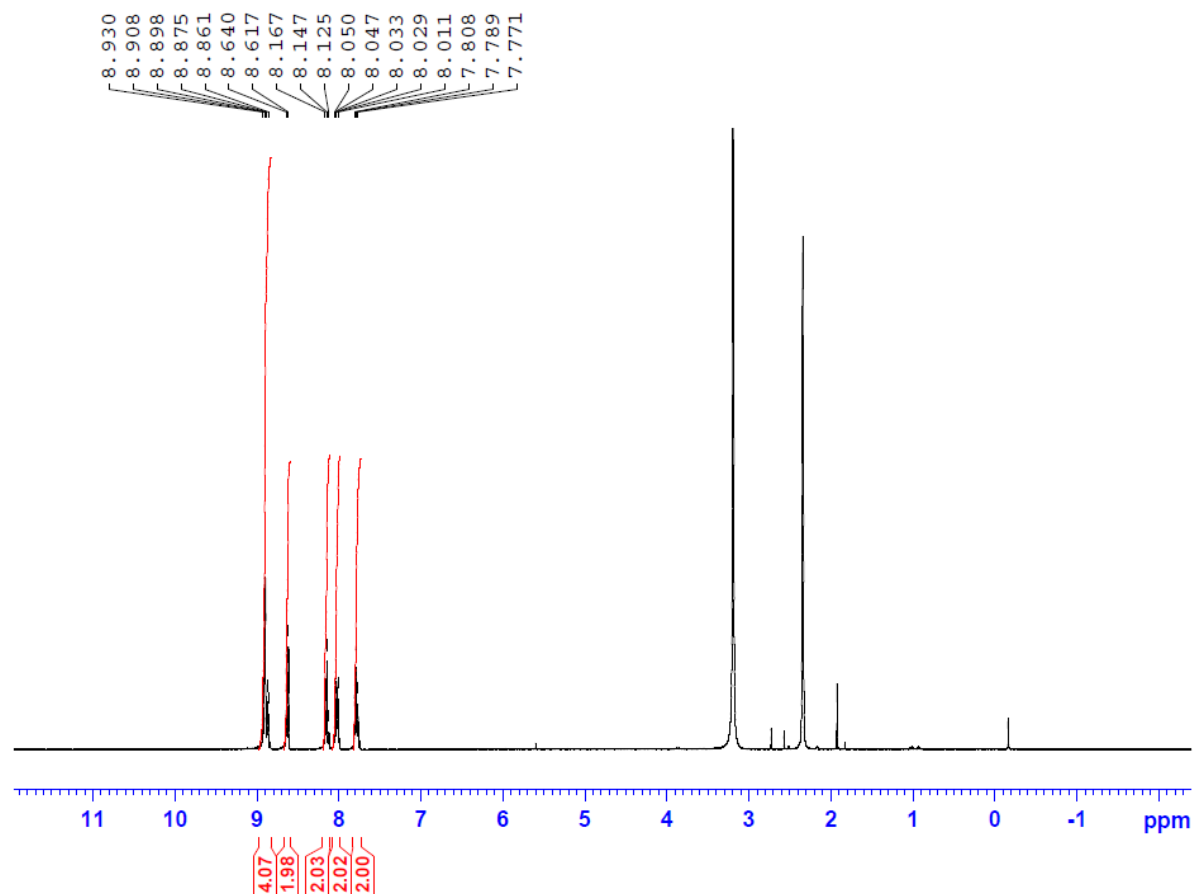

```

NAME      Fai complex
EXPNO     25
PROCNO    1
Date_     20130124
Time      19.13
INSTRUM   spect
PROBHD    5 mm PABBO BB-
PULPROG   zg30
TD        65536
SOLVENT   DMSO
NS        16
DS        2
SWH       8223.685 Hz
FIDRES    0.125483 Hz
AQ        3.9846387 sec
RG        203
DW        60.800 usec
DE        6.50 usec
TE        293.9 K
D1        1.00000000 sec
TD0       1

```

```

===== CHANNEL f1 =====
NUC1      1H
P1        14.04 usec
PL1       -2.00 dB
PL1W      17.39728355 W
SFO1      400.1424710 MHz
SI        32768
SF        400.1400588 MHz
WDW       EM
SSB       0
LB        0.30 Hz
GB        0
PC        1.00

```

**Fig S7.**  $^1\text{H}$ -NMR spectrum of  $\text{Re}(\text{biq})(\text{CO})_3(\text{CN})$  (400 MHz,  $d_6$ -DMSO).

Re-001-CN-pt-20130125

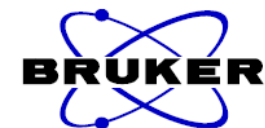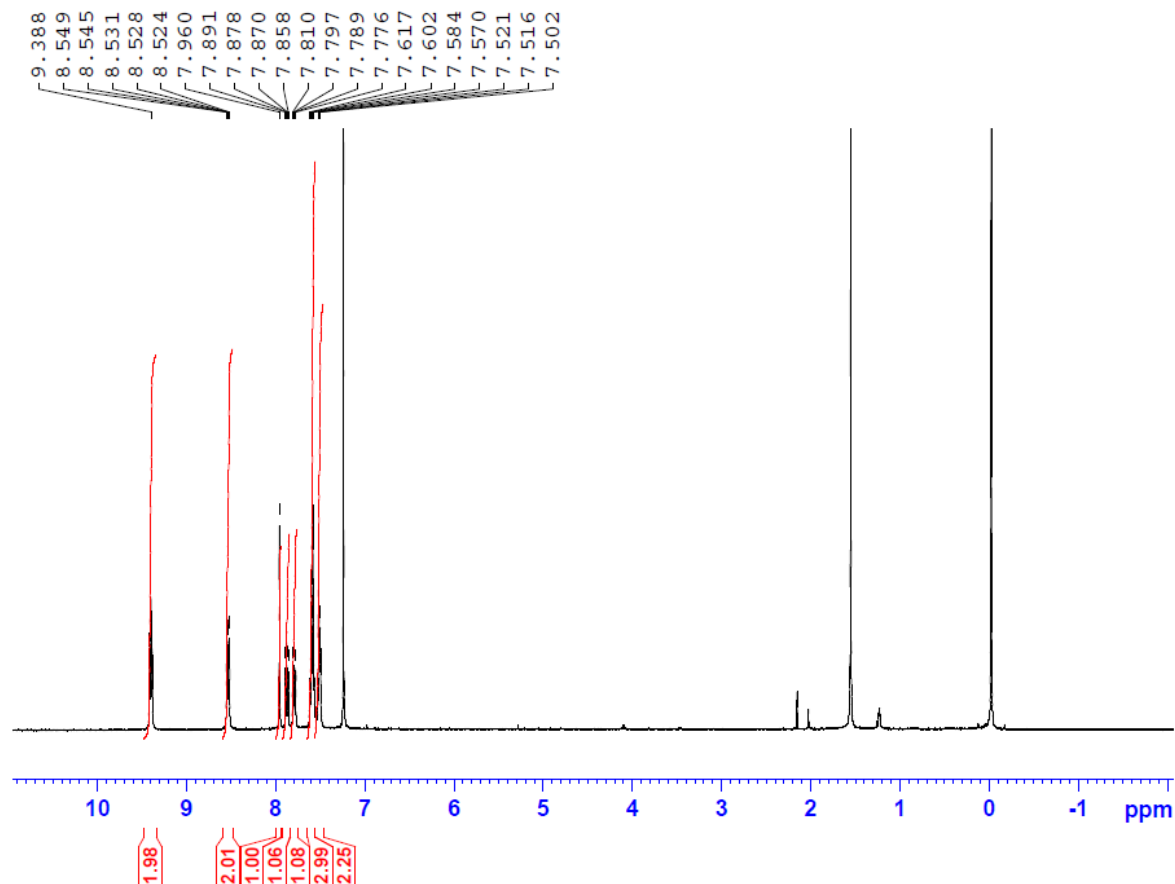

```

NAME      Fai complex
EXPNO     28
PROCNO    1
Date_     20130125
Time      19.35
INSTRUM   spect
PROBHD    5 mm PABBO BB-
PULPROG   zg30
TD        65536
SOLVENT   CDCl3
NS        16
DS        2
SWH       8223.685 Hz
FIDRES    0.125483 Hz
AQ        3.9846387 sec
RG        203
DW        60.800 usec
DE        6.50 usec
TE        293.2 K
D1        1.00000000 sec
TD0       1
  
```

```

===== CHANNEL f1 =====
NUC1      1H
P1        14.04 usec
PL1       -2.00 dB
PL1W      17.39728355 W
SFO1      400.1424710 MHz
SI        32768
SF        400.1400122 MHz
WDW       EM
SSB       0
LB        0.30 Hz
GB        0
PC        1.00
  
```

**Fig S8.**  $^1\text{H}$ -NMR spectrum of  $\text{Re}(5\text{-ph-phen})(\text{CO})_3(\text{CN})$  (400 MHz,  $\text{CDCl}_3$ ).

Re-004-CN-20130125

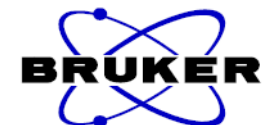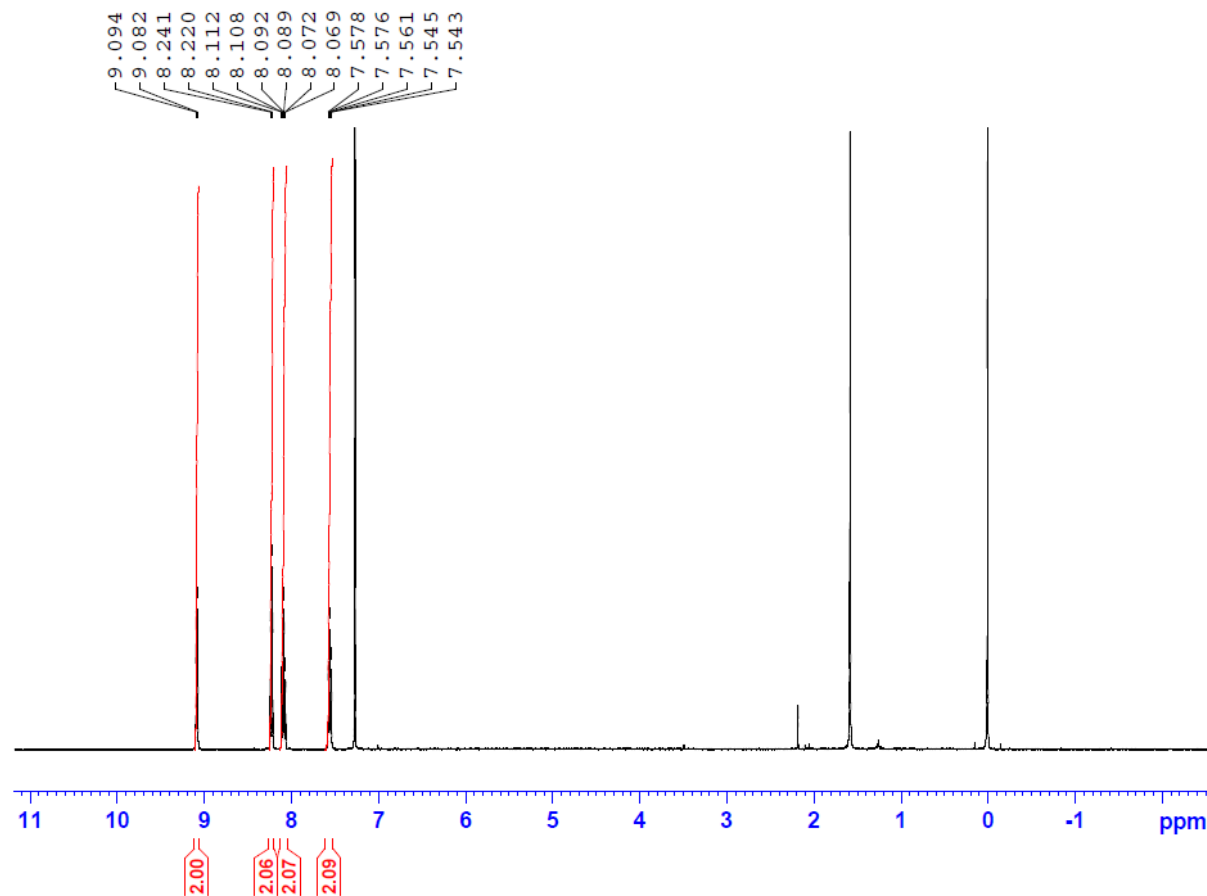

NAME Fai complex  
 EXPNO 32  
 PROCNO 1  
 Date\_ 20130125  
 Time 20.19  
 INSTRUM spect  
 PROBHD 5 mm PABBO BB-  
 PULPROG zg30  
 TD 65536  
 SOLVENT CDCl3  
 NS 16  
 DS 2  
 SWH 8223.685 Hz  
 FIDRES 0.125483 Hz  
 AQ 3.9846387 sec  
 RG 203  
 DW 60.800 usec  
 DE 6.50 usec  
 TE 293.2 K  
 D1 1.00000000 sec  
 TD0 1

===== CHANNEL f1 =====  
 NUC1 1H  
 P1 14.04 usec  
 PL1 -2.00 dB  
 PL1W 17.39728355 W  
 SFO1 400.1424710 MHz  
 SI 32768  
 SF 400.1400000 MHz  
 WDW EM  
 SSB 0  
 LB 0.30 Hz  
 GB 0  
 PC 1.00

**Fig S9.**  $^1\text{H}$ -NMR spectrum of  $\text{Re}(\text{bpy})(\text{CO})_3(\text{CN})$  (400 MHz,  $\text{CDCl}_3$ ).

Re-003-CN-Pt

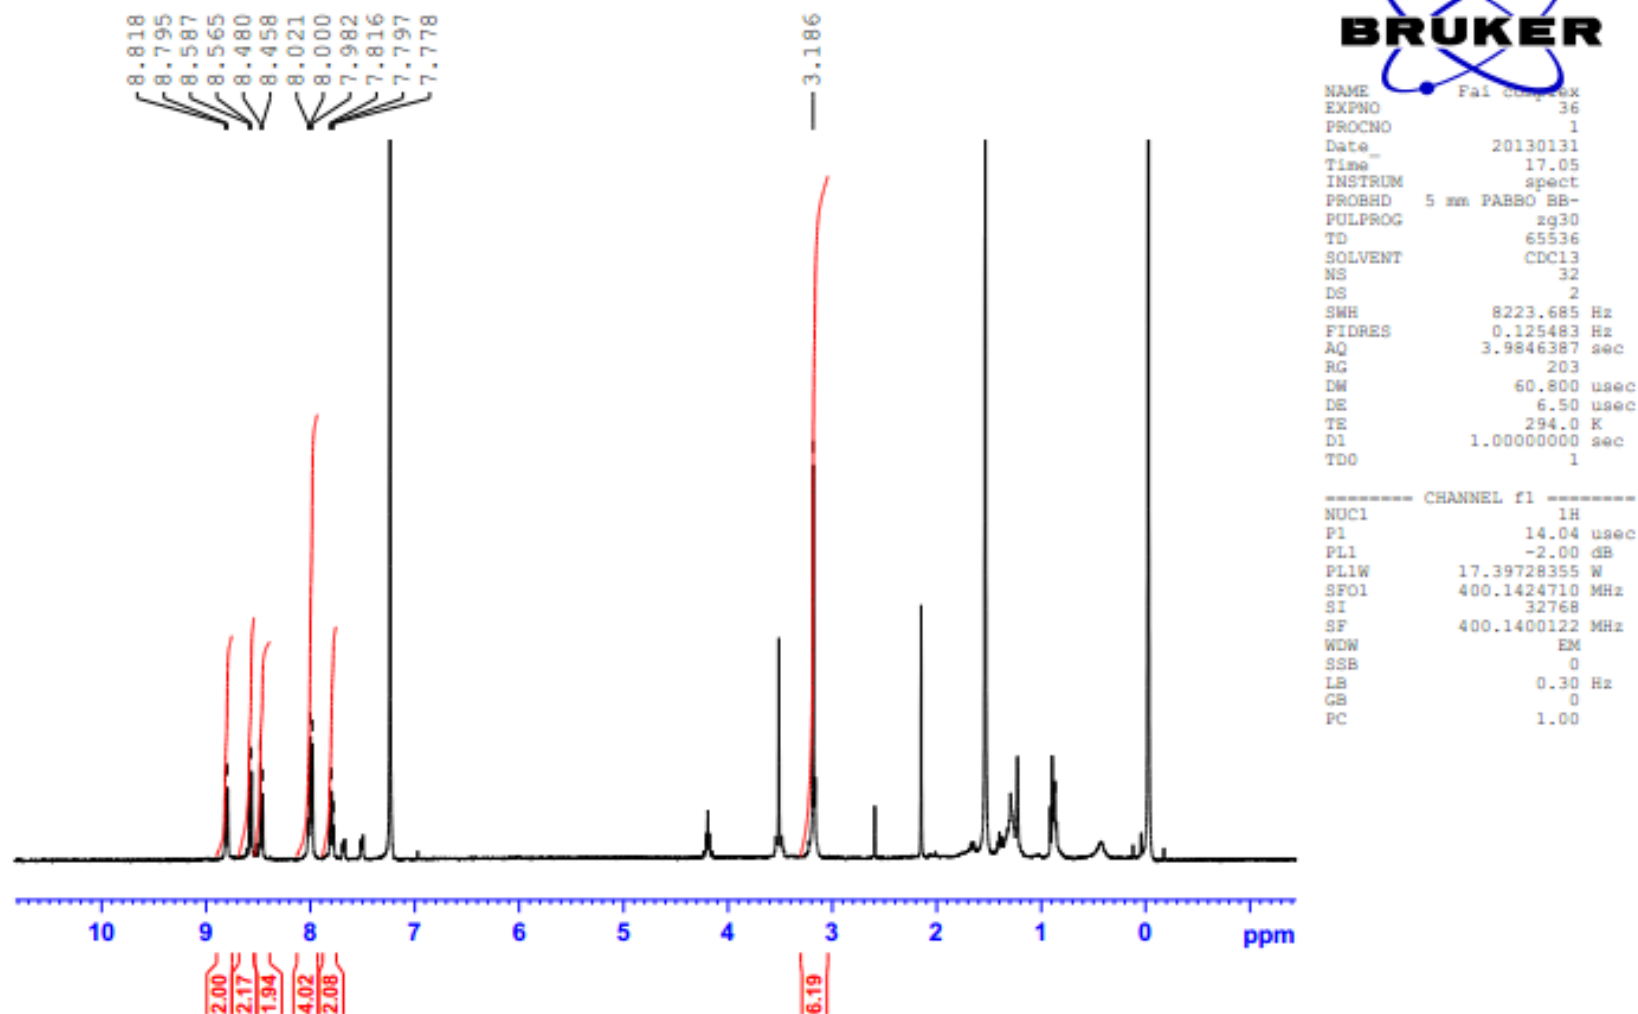

**Fig S10.**  $^1\text{H}$ -NMR spectrum of  $\text{Re}(\text{biq})(\text{CO})_3(\text{CN})\text{-}[\text{Pt}(\text{DMSO})(\text{Cl})_2]$  (**1**) (400 MHz,  $\text{CDCl}_3$ ).

Re-001-CN-Pt-20130125

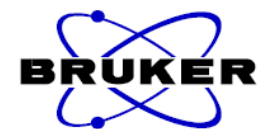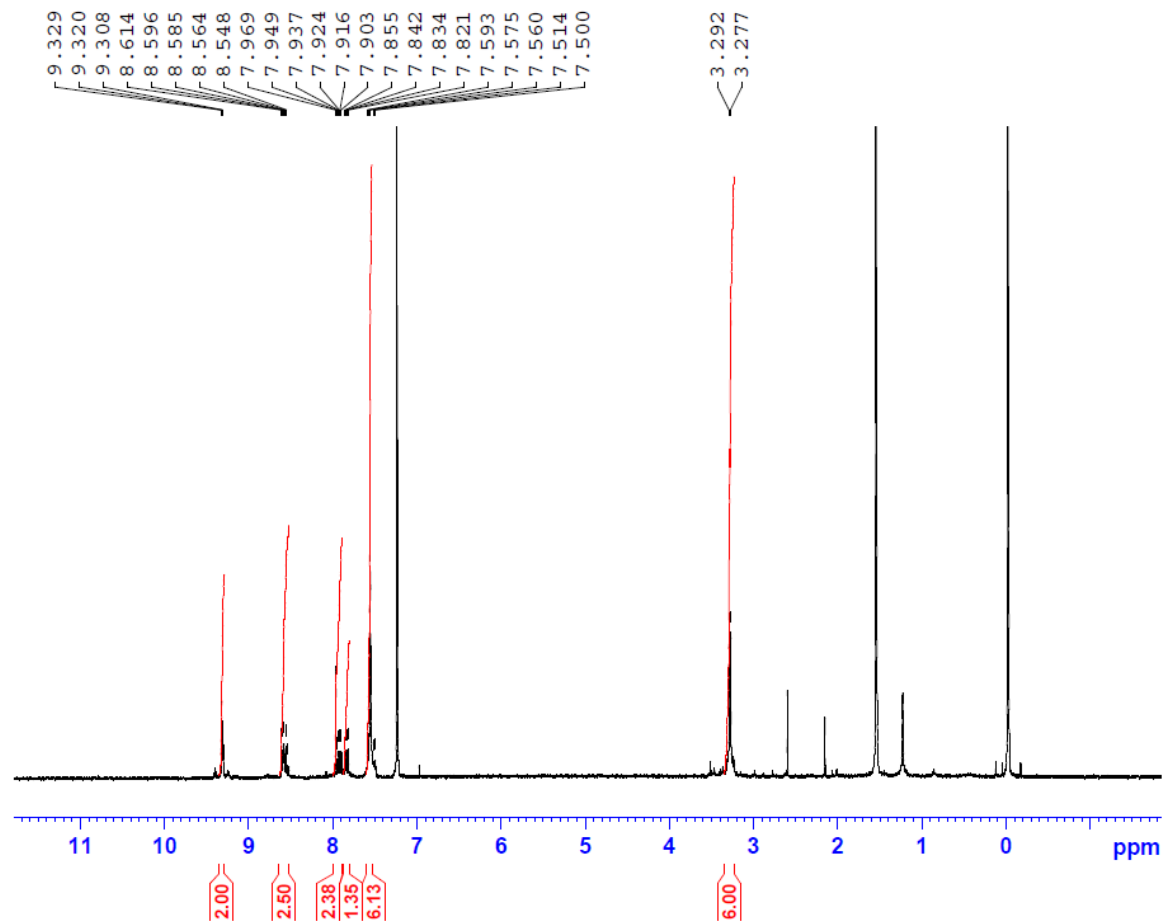

```

NAME      Fai complex
EXPNO     29
PROCNO    1
Date_     20130125
Time      20.02
INSTRUM   spect
PROBHD    5 mm PABBO BB-
PULPROG   zg30
TD        65536
SOLVENT   CDCl3
NS        32
DS        2
SWH       8223.685 Hz
FIDRES    0.125483 Hz
AQ        3.9846387 sec
RG        203
DW        60.800 usec
DE        6.50 usec
TE        293.2 K
D1        1.00000000 sec
TD0       1

===== CHANNEL f1 =====
NUC1      1H
P1        14.04 usec
PL1       -2.00 dB
PL1W      17.39728355 W
SFO1      400.1424710 MHz
SI        32768
SF        400.1400122 MHz
WDW       EM
SSB       0
LB        0.30 Hz
GB        0
PC        1.00
  
```

**Fig S11.**  $^1\text{H}$ -NMR spectrum of  $\text{Re}(5\text{-ph-phen})(\text{CO})_3(\text{CN})\text{-}[\text{Pt}(\text{DMSO})(\text{Cl})_2]$  (**2**) (400 MHz,  $\text{CDCl}_3$ ).

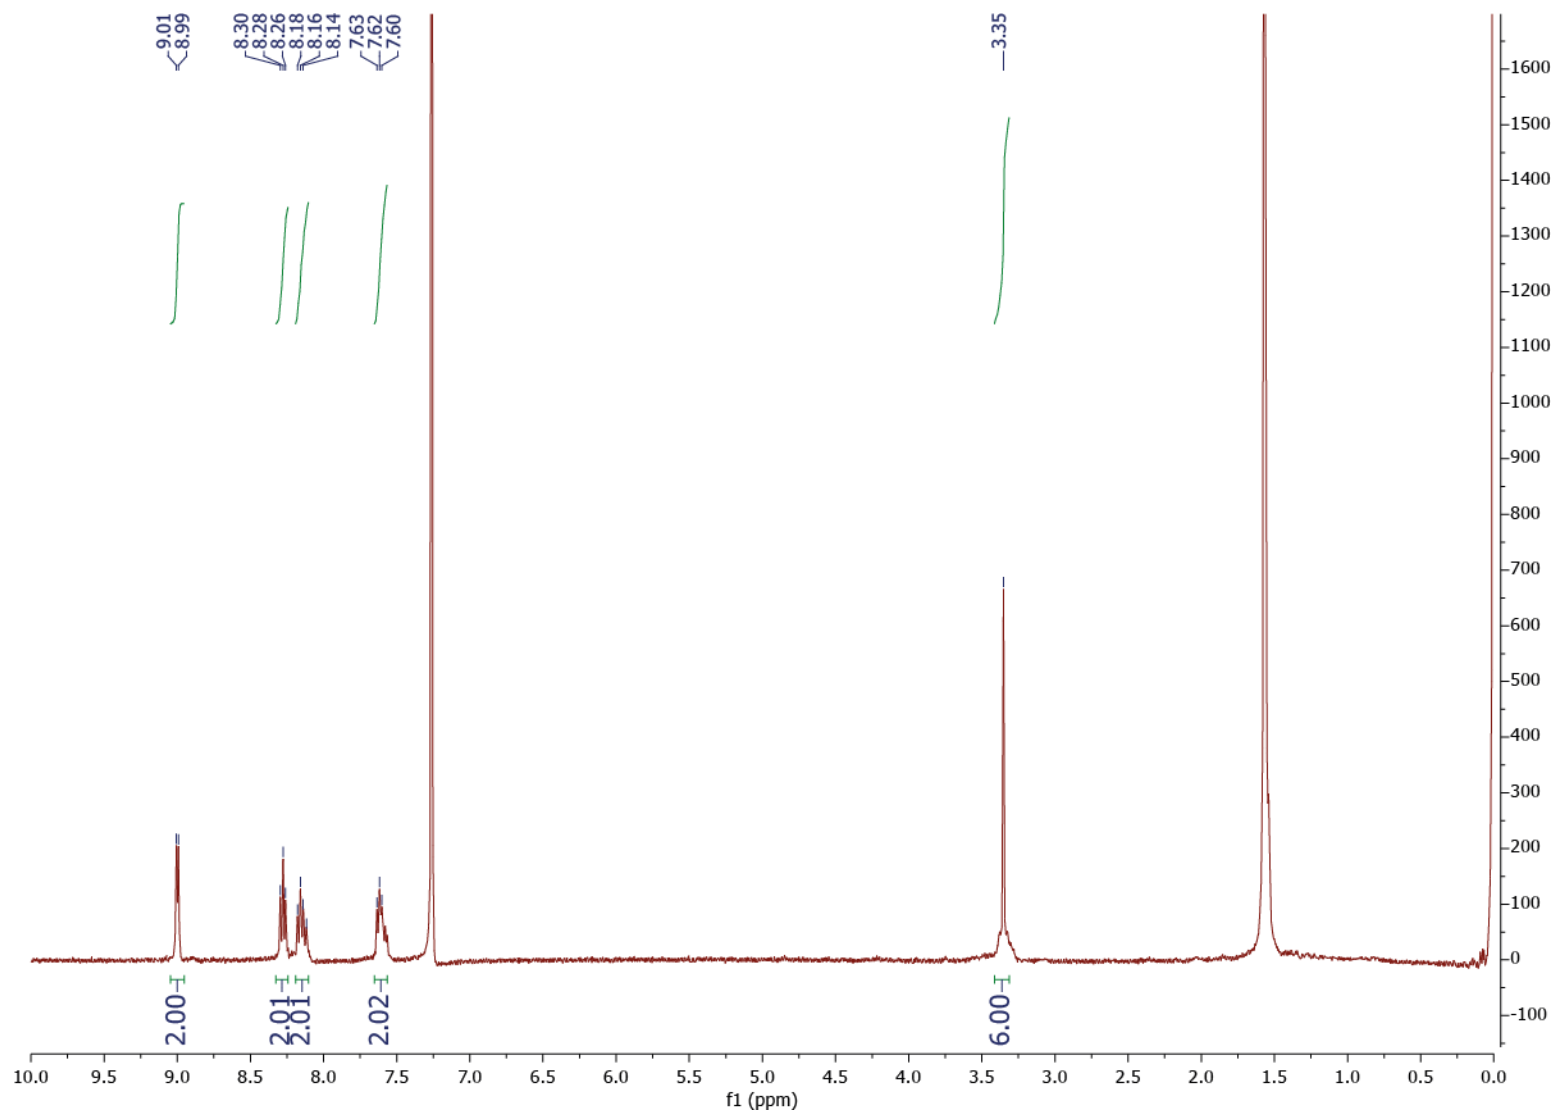

**Fig S12.**  $^1\text{H}$ -NMR spectrum of  $\text{Re}(\text{bpy})(\text{CO})_3(\text{CN})\text{--}[\text{Pt}(\text{DMSO})(\text{Cl})_2]$  (3) (400 MHz,  $\text{CDCl}_3$ ).

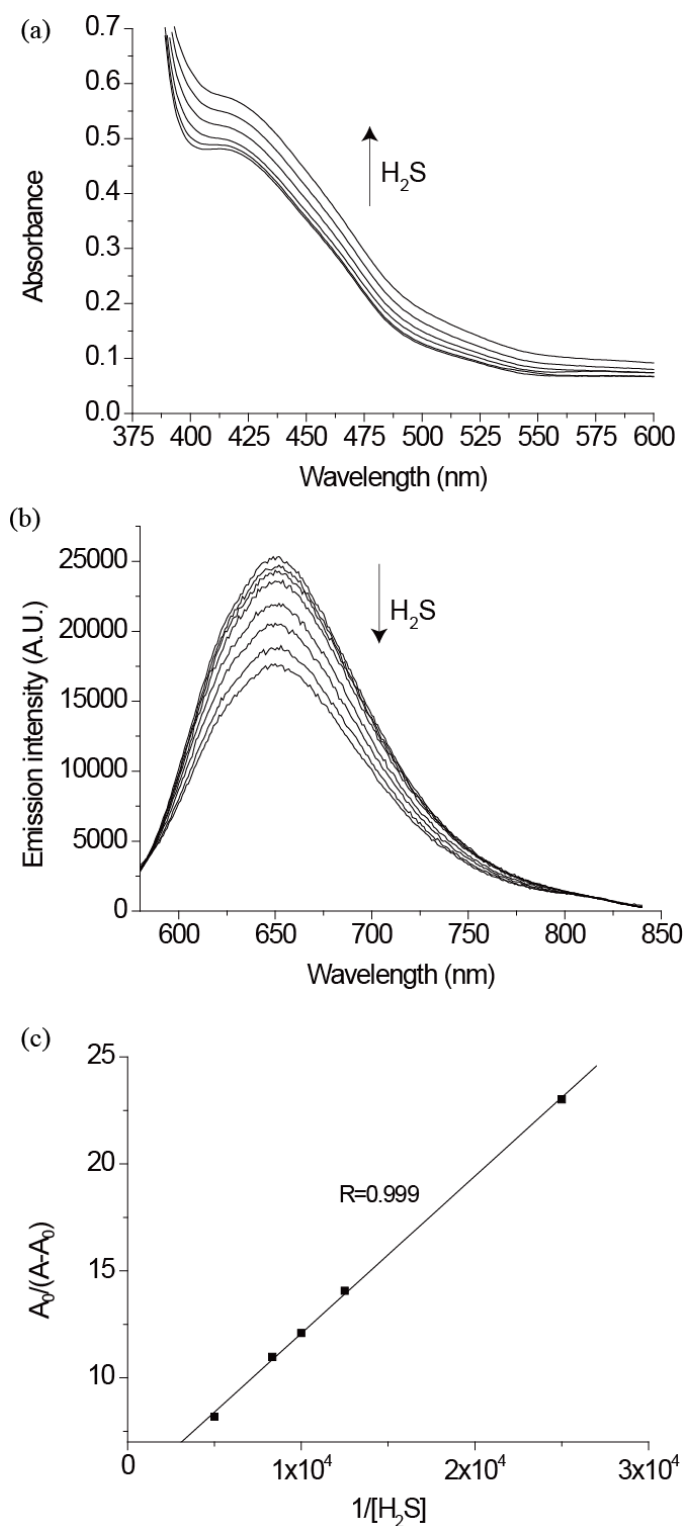

**Fig S13.** (a) UV–Vis absorption spectra and (b) spectrofluorimetric titrations of complex **1** ( $1 \times 10^{-4}$  M) with H<sub>2</sub>S (0 to  $5 \times 10^{-4}$  M) ( $\lambda_{\text{ex}} = 432$  nm). (c) Plot of  $A_0/(A-A_0)$  versus  $1/[\text{H}_2\text{S}]$ : Slope and y-intercept of the best-fit line are  $7.36 \times 10^{-4}$  M and 4.717, respectively,  $\log K = 3.81 \pm 0.005$  at 330 nm. All titrations were carried out in CHCl<sub>3</sub> at 298 K.

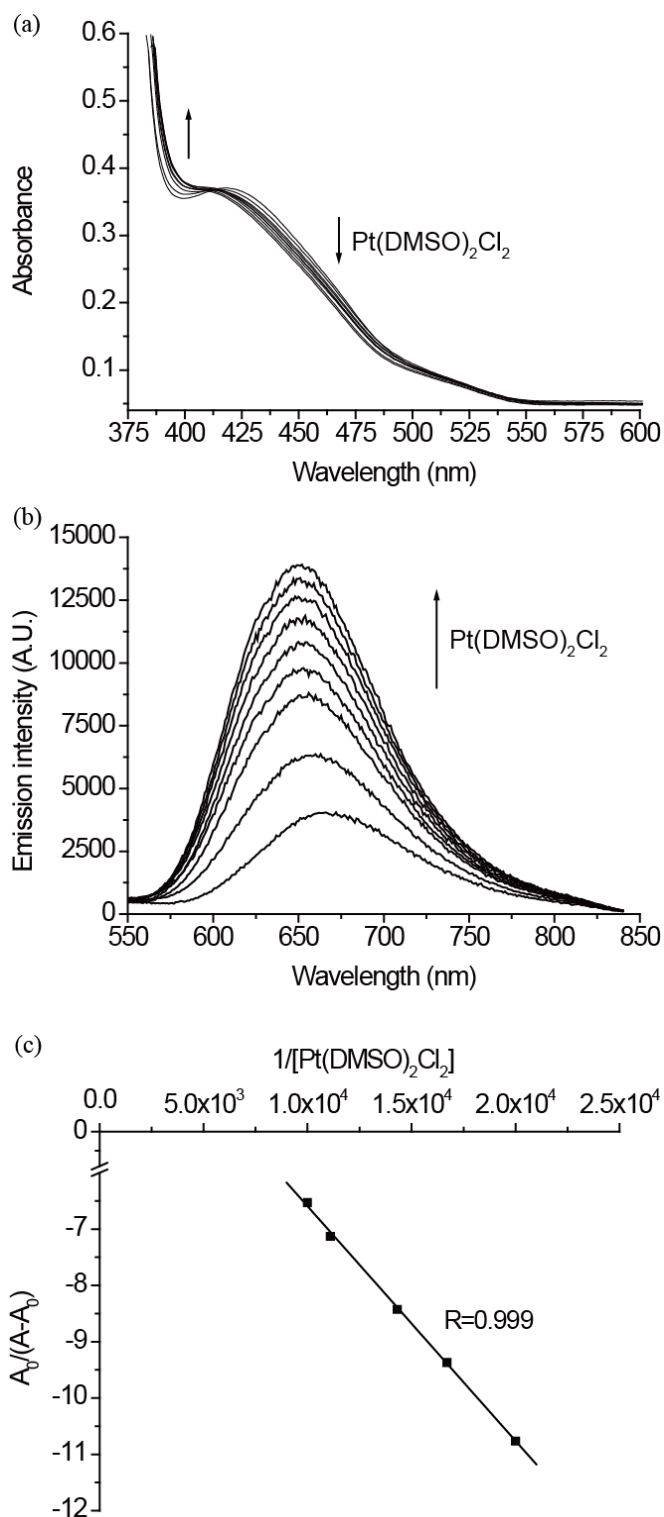

**Fig S14.** (a) UV-vis spectroscopic and (b) spectrofluorimetric titrations of  $\text{Re}(\text{biq})(\text{CO})_3(\text{CN})$  ( $1.0 \times 10^{-4}$  M) with  $\text{Pt}(\text{DMSO})_2\text{Cl}_2$  (0 to  $1.0 \times 10^{-4}$  M). (c) The slope and y-intercept are  $-4.17 \times 10^{-4}$  M and  $-2.426$  respectively of the best fitted  $A_0/(A-A_0)$  versus  $1/[\text{Pt}(\text{DMSO})_2\text{Cl}_2]$  plot with  $\log K = 3.76 \pm 0.02$  at 450 nm. All titrations were carried out in MeOH/ $\text{CHCl}_3$  mixture (v/v 1:1) at 298 K. Excitation  $\lambda_{\text{ex}} = 432$  nm.

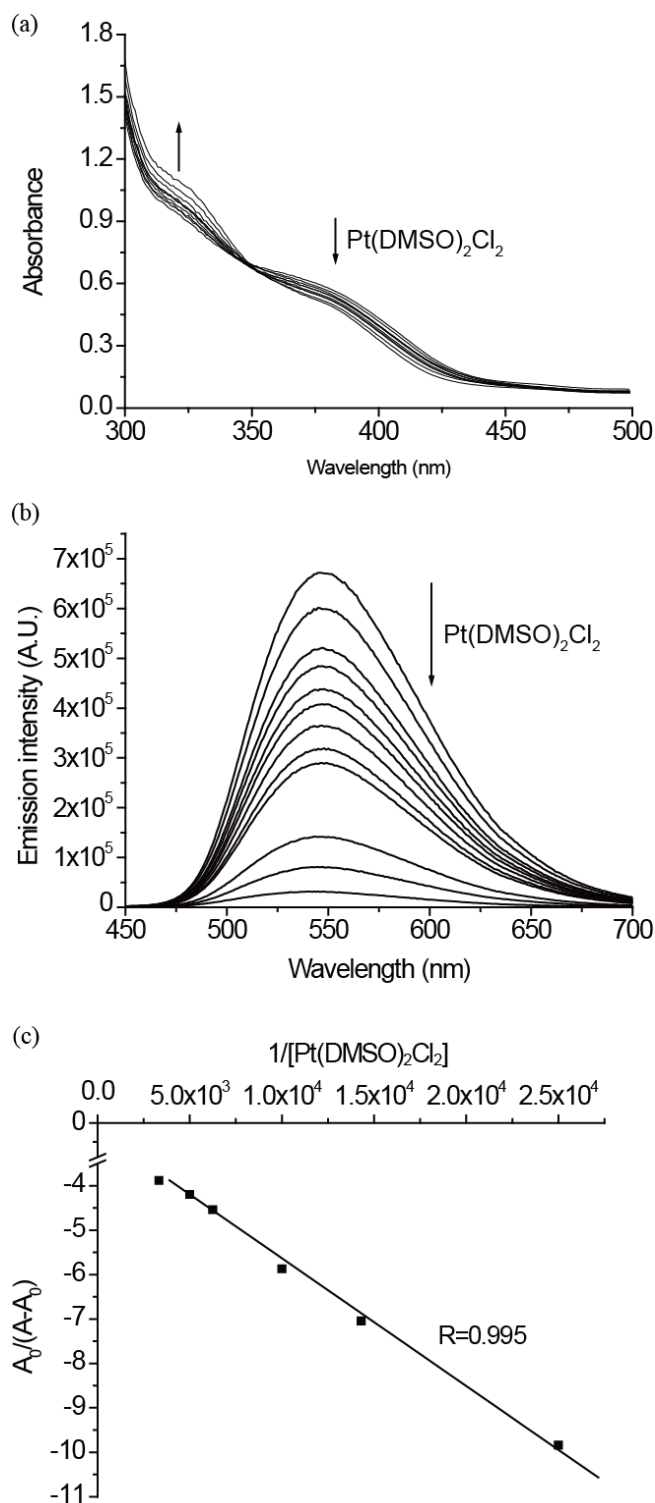

**Fig S15.** (a) UV-vis spectroscopic and (b) spectrofluorimetric titrations of  $\text{Re}(5\text{-ph-phen})(\text{CO})_3(\text{CN})$  ( $1.0 \times 10^{-4}$  M) with  $\text{Pt}(\text{DMSO})_2\text{Cl}_2$  (0 to  $1.0 \times 10^{-4}$  M). (c) The slope and y-intercept are  $-2.88 \times 10^{-4}$  M and  $-2.757$  respectively of the best fitted  $A_0/(A-A_0)$  versus  $1/[\text{Pt}(\text{DMSO})_2\text{Cl}_2]$  plot with  $\log K = 3.98 \pm 0.04$  at 400 nm. All titrations were carried out in MeOH/ $\text{CHCl}_3$  mixture (v/v 1:1) at 298 K. Excitation  $\lambda_{\text{ex}} = 363$  nm.

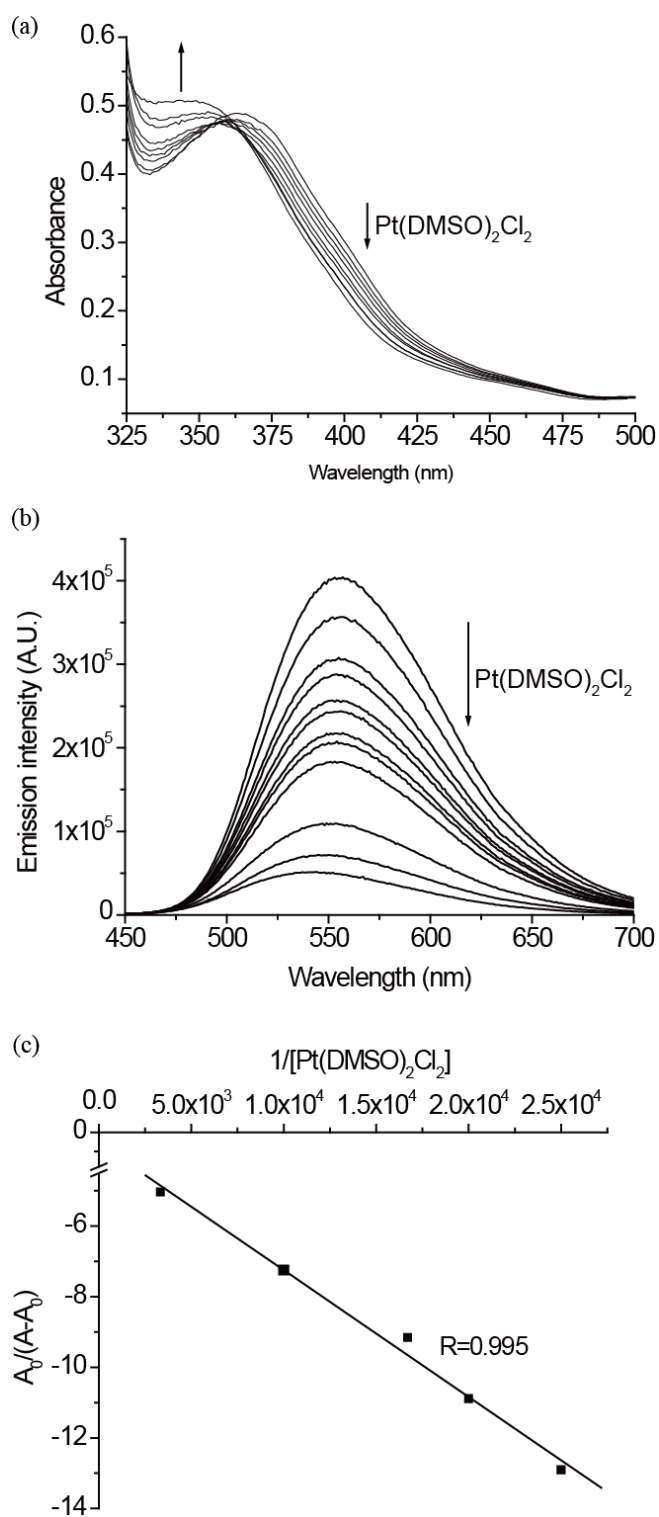

**Fig S16.** (a) UV-vis spectroscopic and (b) spectrofluorimetric titrations of  $\text{Re}(\text{bpy})(\text{CO})_3(\text{CN})$  ( $1.0 \times 10^{-4}$  M) with  $\text{Pt}(\text{DMSO})_2\text{Cl}_2$  (0 to  $1.0 \times 10^{-4}$  M). (c) The slope and y-intercept are  $-3.59 \times 10^{-4}$  M and -3.656 respectively of the best fitted  $A_0/(A-A_0)$  versus  $1/[\text{Pt}(\text{DMSO})_2\text{Cl}_2]$  plot with  $\log K = 4.01 \pm 0.04$  at 400 nm. All titrations were carried out in  $\text{MeOH}/\text{CHCl}_3$  mixture (v/v 1:1) at 298 K. Excitation  $\lambda_{\text{ex}} = 371$  nm.

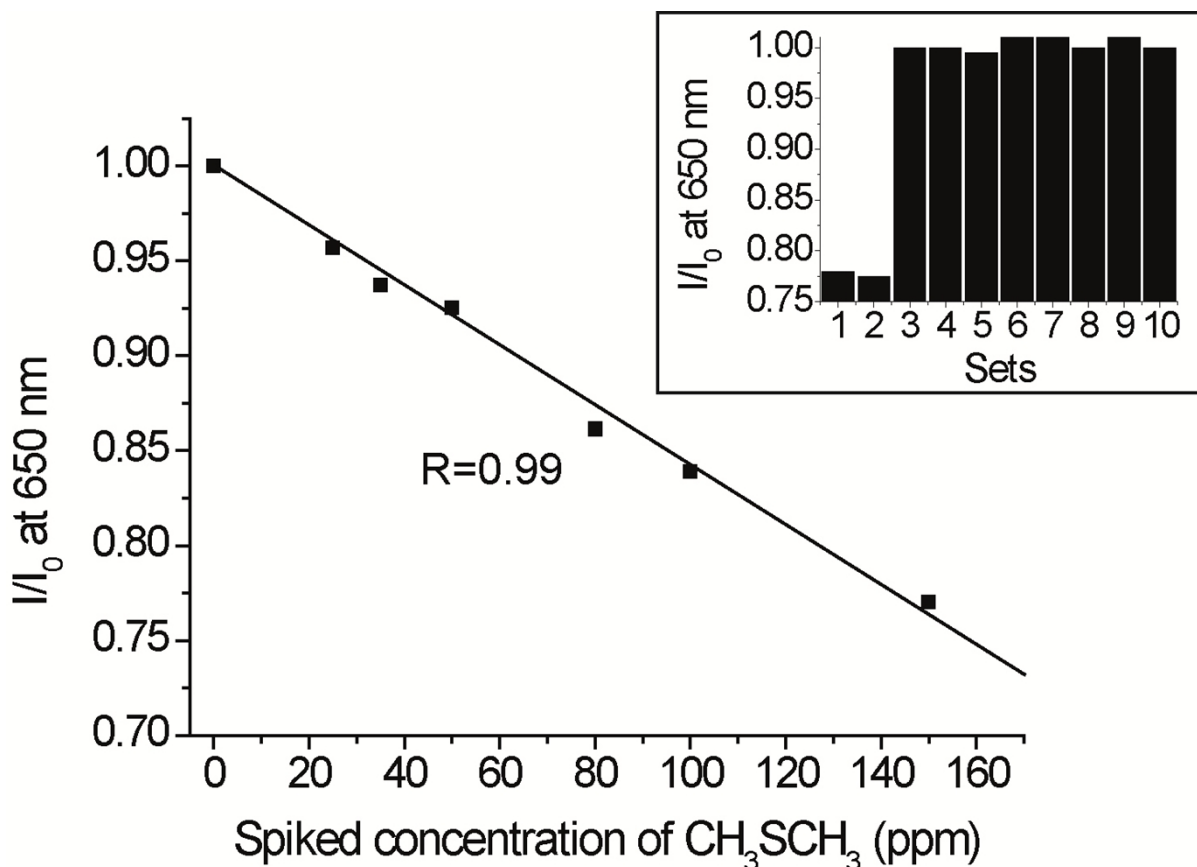

**Fig 17.** (Inset): Spectrofluorometric responses ( $I/I_0$  at 650 nm) of complex **1** ( $1 \times 10^{-4}$  M) toward a series of homogenized swine loin samples (20.0 g; *Sus scrofa domestica*) stored in the presence of different vapors: (set 1) Dimethyl sulfide; (set 2) a mixture of dimethyl sulfide and common BVCs (dimethyl disulfide, dimethyl trisulfide, CO, triethylamine, propanoic acid, 4-ethylphenol, and  $\text{CH}_4$ ; each at 150 ppm); (set 3–9) common BVCs (dimethyl disulfide, dimethyl trisulfide, CO, triethylamine, propanoic acid, 4-ethylphenol, and  $\text{CH}_4$ ); and (set 10) a mixture of the common BVCs used in sets 3–9 (each at 150 ppm). Results of spectrofluorimetric titration of complex **1** ( $1 \times 10^{-4}$  M) in the swine loin sample spiked with increasing concentration of  $\text{CH}_3\text{SCH}_3$ . The best-fit line of the plot of  $I/I_0$  versus  $[\text{CH}_3\text{SCH}_3]$  revealed a slope and y-intercept of  $1.59 \times 10^{-3}$  and 1.00 ppm, respectively. All titrations were carried out in chloroform at 298 K.
